# Supplementary material for: Sustainable Quality of Life: A Conceptualization That Integrates the Views of Inhabitants of Swiss Rural Regions
Source: MDPI journal article supplement (doi:10.3390/su13169187), 2021-08-16
Supplement: s1 [file s1]

# Supplementary information:

## “Sustainable Quality of Life: A Conceptualisation that Integrates Views of Inhabitants of Swiss Rural Regions”

### Contents

|   |                                                                |    |
|---|----------------------------------------------------------------|----|
| 1 | KEY SOURCES USED FOR PRELIMINARY DEFINITION OF SQoL COMPONENTS | 1  |
| 2 | INTERVIEW GUIDE.....                                           | 3  |
| 3 | TRANSCRIPTION GUIDE.....                                       | 6  |
| 4 | GUIDE FOR CONTENT ANALYSIS.....                                | 8  |
| 5 | CODEBOOK.....                                                  | 10 |

### 1 Key Sources Used for Preliminary Definition of SQoL Components

Table S1 shows for each component of our preliminary definition of SQoL the key literature from which it was derived. The preliminary definition served as a theoretical basis for the 90 qualitative interviews.

*Table S1. Components of Sustainable Quality of Life (SQoL) derived from key literature.*

| Component                     | Target                                                                                                                                                                                                        | Justification                                                                                                                                                                                                                                                                                                                                                     | Key source and concept                                                                                                                                                                                                                               |
|-------------------------------|---------------------------------------------------------------------------------------------------------------------------------------------------------------------------------------------------------------|-------------------------------------------------------------------------------------------------------------------------------------------------------------------------------------------------------------------------------------------------------------------------------------------------------------------------------------------------------------------|------------------------------------------------------------------------------------------------------------------------------------------------------------------------------------------------------------------------------------------------------|
| Social relations and equality | The greatest possible freedom and equal opportunities. Intra- and intergenerational justice.                                                                                                                  | Justice and recognition are fundamental to living a self-determined life with equal opportunities, in freedom, without environmental pressures, and with sufficient resources. Living in a society, having relationships, and thus feeling empathy for other people and other living beings satisfies the human need for closeness and enables joint development. | Nussbaum (2011)[1]: «Capability Approach»<br>Rawls (2009) [2]: “Theory of Justice”<br>Schlosberg (2009) [3]: «Environmental Justice»<br>Sen (1993) [4]: “Capability Approach”<br>United Nations (2019)[5]: “SDG’S”                                   |
|                               | Opportunities for social relations. No discrimination based on gender, ethnicity, religion, species, or other affiliation. Recognition of potentially excluded groups as a basis for (environmental) justice. |                                                                                                                                                                                                                                                                                                                                                                   |                                                                                                                                                                                                                                                      |
| Nature and landscape          | High quality of nature and landscapes for all present and future generations.                                                                                                                                 | High-quality nature and landscapes stimulate positive emotions and have a positive influence on physical and mental health. Nature and landscape enable recreation and community experiences outdoors.                                                                                                                                                            | Bieling et al. (2014) [6]: “Well-Being and Landscape”<br>Bignante (2015) [7]: “Well-Being and Landscape”<br>Nussbaum, (2011) [1]: “Capability Approach”<br>United Nations, (2019) [5]: “SDG’S”                                                       |
|                               |                                                                                                                                                                                                               |                                                                                                                                                                                                                                                                                                                                                                   |                                                                                                                                                                                                                                                      |
| Education and knowledge       | A good general and specific education and knowledge.                                                                                                                                                          | A good education and knowledge is essential to individual development, to shaping one’s own life, and to participating in social life. Education on the environment and sustainability enables people to increase sustainability in their own lives and to contribute to development.                                                                             | Federal Statistical Office (2019) [8]: “Swiss welfare measurement”<br>Frey & Stutzer (2010) [9]: “Happiness/Satisfaction”<br>Layard (2009) [10]: “Happiness”<br>Nussbaum, (2011) [1]: “Capability Approach”<br>OECD (2017) [11]: “Better Life Index” |
|                               | Education on the environment and sustainability. The ability to absorb and process information, think critically, and use one’s personal knowledge.                                                           |                                                                                                                                                                                                                                                                                                                                                                   |                                                                                                                                                                                                                                                      |

|                                  |                                                                                                                                                                                         |                                                                                                                                                                                                                                                                                                                            |                                                                                                                                                                                                                                                                                                                         |
|----------------------------------|-----------------------------------------------------------------------------------------------------------------------------------------------------------------------------------------|----------------------------------------------------------------------------------------------------------------------------------------------------------------------------------------------------------------------------------------------------------------------------------------------------------------------------|-------------------------------------------------------------------------------------------------------------------------------------------------------------------------------------------------------------------------------------------------------------------------------------------------------------------------|
|                                  |                                                                                                                                                                                         |                                                                                                                                                                                                                                                                                                                            | Sen (1993) [4]: “Capability Approach”<br>United Nations (2019): “SDG’S”                                                                                                                                                                                                                                                 |
| Living                           | Appropriate, environmentally friendly, and resource-efficient living conditions that are not impaired by environmental pollution.                                                       | Living conditions appropriate to the individual situation that are not impaired by environmental pollution are essential to well-being. To reduce environmental pollution, it is important that living should be as environmentally friendly and resource-efficient as possible for everyone.                              | Federal Statistical Office (2019) [8]: “Swiss welfare measurement”<br>Frey & Stutzer (2010) [9]: “Happiness/Satisfaction”<br>Layard (2009) [10]: “Happiness”<br>OECD (2017) [11]: “Better Life Index”<br>Preisendörfer (2014) [12]: “Environmental Justice”<br>Wackernagel et al. (2019) [13]: “Ecological Ressources “ |
| Health and safety                | A long and healthy life without fear and without the danger of conflicts or negative environmental and climatic influences.                                                             | A good physical and mental individual constitution, safety, and an intact environment are essential conditions for a successful life.                                                                                                                                                                                      | Frey & Stutzer (2010) [9]: “Happiness/Satisfaction”<br>Layard (2009) [10]: “Happiness”<br>Nussbaum (2011) [1]: “Capability Approach”<br>United Nations (2019)[5]: “SDG’S”<br>Wackernagel et al. (2019) [13]: “Ecological Ressources “<br>Weimann et al. (2015) [14]: “Happiness/Satisfaction”                           |
| Participation and identification | Freedom of choice, the right to have a say, and effective participation in social processes. Identification with one’s social environment and home area.                                | Participation and freedom of choice are important for self-determination and the control over one’s personal well-being. Identification promotes participation in social processes and reduces the likelihood of conflict.                                                                                                 | Frey & Stutzer (2010) [9]: “Happiness/Satisfaction”<br>Lengen (2016) [15]: “Identification”<br>United Nations, (2019) [5]: “SDG’S”<br>Weimann et al. (2015) [14]: “Happiness/Satisfaction”                                                                                                                              |
| Mobility                         | Environmentally friendly and resource-efficient mobility for everyone.                                                                                                                  | Mobility is fundamental for the supply of goods and services, for individual freedom, and for the maintenance of social relationships.                                                                                                                                                                                     | Meschik & Meth (2008) [16]: “Ecological Mobility”<br>Nussbaum (2011) [1]: “Capability Approach”<br>Wackernagel et al. (2019) [13]: “Ecological Ressources “                                                                                                                                                             |
| Leisure and recreation           | Leisure activities, recreation, and cultural activities that are as environmentally friendly as possible and compatible with the conservation of renewable natural resources.           | Leisure activities, recreation, and cultural activities satisfy the need for expression, social life, entertainment, and education. Culture and art offer opportunities for sharing, creativity, and an understanding of common values that can promote sustainable development.                                           | Kurt & Wagner, (2001) [17]: “Culture, Art and Sustainability”<br>Nurse (2006) [18]: “Culture as the Pillar of Sustainability”<br>Nussbaum (2011): “Capability Approach”<br>United Nations (2019) [5]: “SDG’S”                                                                                                           |
| Income and employment            | Employment within a resource-efficient and environmentally friendly economy. Employment that is freely chosen, meaningful, and provides sufficient income and a good work-life balance. | Sufficient income and meaningful work are essential for a successful life. To counteract scarcity of natural resources and existing environmental and social problems, it is important that income and work are generated within a resource-efficient and environmentally friendly economy that ensures fair distribution. | Federal Statistical Office (2019) [8]: “Swiss welfare measurement”<br>Frey & Stutzer (2010) [9]: “Happiness/Satisfaction”<br>Layard (2009) [10]: “Happiness”<br>OECD (2017) [11]: “Better Life Index”<br>United Nations (2019) [5]: “SDG’S”<br>Weimann et al. (2015) [4]: “Happiness/Satisfaction”                      |

## References

1. Nussbaum, M.C. *Creating Capabilities. The Human Development Approach*; Harvard University Press: Cambridge, United States of America, 2011;
2. Rawls, J. *A Theory of Justice*; Harvard University Press: Harvard, United States of America, 2009; ISBN 978-0-674-04258-2.
3. Schlosberg, D. *Defining Environmental Justice: Theories, Movements, and Nature*; Oxford University Press: Oxford, Great Britain, 2009;
4. Sen, A. Capability and Well-Being. In *The quality of life*; Oxford University Press: Oxford, Great Britain, 1993; pp. 62–66.
5. United Nations *The Sustainable Development Goals Report*; New York, United States of America, 2019. Available online: <https://unstats.un.org/sdgs/report/2019/> (accessed on 6 August 2021).
6. Bieling, C.; Plieninger, T.; Pirker, H.; Vogl, C.R. Linkages between Landscapes and Human Well-Being: An Empirical Exploration with Short Interviews. *Ecological Economics* **2014**, *105*, 19–30, doi:10/f6jsdr.
7. Bignante, E. Therapeutic Landscapes of Traditional Healing: Building Spaces of Well-Being with the Traditional Healer in St. Louis, Senegal. *Social & Cultural Geography* **2015**, *16*, 698–713, doi:10/gg3kcw.
8. Federal Statistical Office *Indikatorensystem Wohlfahrtsmessung. Ausgabe 2019. Schaffung, Verteilung und Erhalt der Wohlfahrt*; Neuchâtel, Switzerland, 2019. Available online: <https://www.bfs.admin.ch/bfs/de/home/statistiken/kataloge-datenbanken/publikationen.assetdetail.10567383.html> (accessed on 6 August 2021).
9. Frey, B.S.; Stutzer, A. *Happiness and Economics: How the Economy and Institutions Affect Human Well-Being*; Princeton University Press: Princeton, United States of America, 2010;
10. Layard, R. *Happiness: Lessons from a New Science*; Reprint Edition.; Penguin Group: London, Great Britain, 2006; ISBN 978-0-14-303701-9.
11. OECD *How's Life? 2017 Measuring Well Being*; OECD: Paris, France, 2017;
12. Preisendörfer, P. Umweltgerechtigkeit. Von Sozial-Räumlicher Ungleichheit Hin Zu Postulierter Ungerechtigkeit Lokaler Umweltbelastungen. *SozW Soziale Welt* **2014**, *65*, 25–45, doi:10/gg3kcx.
13. Wackernagel, M.; Lin, D.; Evans, M.; Hanscom, L.; Raven, P. Defying the Footprint Oracle: Implications of Country Resource Trends. *Sustainability* **2019**, *11*, 2164, doi:10/gg3kcd.
14. Weimann, J.; Knabe, A.; Schöb, R. *Measuring Happiness: The Economics of Well-Being*; MIT Press: Cambridge, MA, USA, 2015; ISBN 978-0-262-02844-8.
15. Lengen, C. Place Identity: Identitätskonstituierende Funktionen von Ort und Landschaft. In *Landschaft, Identität und Gesundheit*; Springer: Wiesbaden, Germany, 2016; pp. 185–199 ISBN 978-3-531-19722-7.
16. Meschik, M.; Meth, D. Öffentliches Verkehrsangebot in Ländlichen Räumen - Gestaltungsmöglichkeiten Und Auswirkungen Auf Die Lebensqualität. *Gaia* **2008**, *17*, 42–49, doi:10/gg3kck.
17. Kurt, H.; Wagner, B. *Kultur - Kunst - Nachhaltigkeit: Die Bedeutung von Kultur Für Das Leitbild Nachhaltige Entwicklung*; Klartext Verlag: Essen, Germany, 2001;
18. Nurse, K. Culture as the Fourth Pillar of Sustainable Development. *Small states: economic review and basic statistics* **2006**, *11*, 28–40.

## 2 Interview Guide

### Guidelines for the researchers

First, the respondent is informed about who we are, what our research project is about, and what its topic is (sustainable quality of life); that we will ask questions about personal details (age, place of residence, education, occupation); about confidentiality and that the interview will be recorded and transcribed. Oral consent is obtained for the anonymous use of the respondent's statements.

The interview is conducted according to Table S2, proceeding horizontally, from open narration to concrete enquiry, for each topic. First the topic is opened with an open narrative-generating question ("narrative impulse"). Then the interview follows the contents of the respondent's narrative; specific questions ("specific demand") are asked accordingly. Next, questions are asked to find out the respondent's opinions and perceptions ("general questions"). The questions listed under "specific demand" and "general questions" provide examples of different opinions. Finally, questions are asked which are essential for answering our research questions but which have not been answered so far ("important questions").

The topic headings listed in the first column, serve our own orientation only. Furthermore, it is not mandatory to proceed in the order they are listed. The respondent gives impulses on the discussed topics, the researcher follows the narrative and chooses our topics to match the content of the impulse given. However, in the end, all topics should have been covered, no matter in which order.

Table S1: Interview guide (translated from German)

| Topic                         | Narrative impulse                                       | Specific demand (examples)                                                   | General questions (examples)                                                           | Important questions                                                                                                                                                                        |
|-------------------------------|---------------------------------------------------------|------------------------------------------------------------------------------|----------------------------------------------------------------------------------------|--------------------------------------------------------------------------------------------------------------------------------------------------------------------------------------------|
| <i>Introduction</i>           | How did you come to live here?                          |                                                                              |                                                                                        |                                                                                                                                                                                            |
|                               | How do you find life here?                              | Can you describe it?                                                         | How is that for you?<br>Was it any different?                                          |                                                                                                                                                                                            |
| <i>New components of SQoL</i> | Can you describe what you think belongs to a good life? | Can you describe examples?<br><br>Do you see this as important for everyone? | Are there other things that are important for a good life?<br><br>Why do you think so? | We have also thought about components and included e.g. (...). What do you think about...<br>-Social relations and equality<br>- Participation and identification<br>-Nature and landscape |

|                                                            |                                                                                                                                                                                                                                                                                                                                                                                                         |                                                                                                                 |                                  |                                                                                                                                                                                                                   |
|------------------------------------------------------------|---------------------------------------------------------------------------------------------------------------------------------------------------------------------------------------------------------------------------------------------------------------------------------------------------------------------------------------------------------------------------------------------------------|-----------------------------------------------------------------------------------------------------------------|----------------------------------|-------------------------------------------------------------------------------------------------------------------------------------------------------------------------------------------------------------------|
|                                                            |                                                                                                                                                                                                                                                                                                                                                                                                         | What do you think it takes for a good life for everyone?                                                        |                                  | <ul style="list-style-type: none"> <li>- Education and Knowledge</li> <li>- Leisure and recreation</li> <li>- Health and safety</li> <li>- Income and Employment</li> <li>- Mobility</li> <li>- Living</li> </ul> |
|                                                            |                                                                                                                                                                                                                                                                                                                                                                                                         | Why is this important to you?                                                                                   |                                  |                                                                                                                                                                                                                   |
|                                                            |                                                                                                                                                                                                                                                                                                                                                                                                         | Why is this less important to you?                                                                              |                                  |                                                                                                                                                                                                                   |
| Components of SQoL (with our definition of sustainability) | As we discussed at the beginning, our investigation is about quality of life and sustainability. And sustainability is a broad term. We understand it to mean that all people in the world have a good life now and in the future without harming the environment. How do you assess the various areas of life that we talked about? Are there also areas where sustainability is difficult to achieve? | Can you describe examples?                                                                                      | What do you think about this?    | How do you see that regarding the components we talked about earlier...(remind of our nine components if necessary)                                                                                               |
| Discrepancies between QoL and Sustainability               | How do you assess the various areas of life that we talked about? Are there also areas where sustainability is difficult to achieve?                                                                                                                                                                                                                                                                    | What do you think is missing to live sustainably?                                                               | Why do you think it's like this? |                                                                                                                                                                                                                   |
|                                                            | Are there things here in the region where sustainability and quality of life have improved or have worsened?                                                                                                                                                                                                                                                                                            | What has to be change that future generations can live well?                                                    | Has it always been like this?    |                                                                                                                                                                                                                   |
|                                                            |                                                                                                                                                                                                                                                                                                                                                                                                         | Can you describe it?                                                                                            | How do you feel about this?      |                                                                                                                                                                                                                   |
|                                                            |                                                                                                                                                                                                                                                                                                                                                                                                         | How did it happen?                                                                                              | What do you think of that?       |                                                                                                                                                                                                                   |
|                                                            |                                                                                                                                                                                                                                                                                                                                                                                                         |                                                                                                                 | Why do you think that is?        |                                                                                                                                                                                                                   |
| New components of SQoL                                     | Is there anything else you would like to add? Something you missed in our conversation?                                                                                                                                                                                                                                                                                                                 | Whatever else you can think of...                                                                               |                                  |                                                                                                                                                                                                                   |
|                                                            |                                                                                                                                                                                                                                                                                                                                                                                                         | Do you think we missed to talk about any other components of sustainable quality of life or about difficulties? |                                  |                                                                                                                                                                                                                   |
| Log for the sampling                                       | Can I ask you briefly about some personal details?                                                                                                                                                                                                                                                                                                                                                      |                                                                                                                 |                                  |                                                                                                                                                                                                                   |

---

### 3 Transcription Guide

#### Transcription method

Semantic content transcription (Inhaltlich semantische Transkription) following Dresing and Pehl [1]

#### Software

F4 und F5: <https://www.audiotranskription.de/english/f4>

#### Guidelines for the researchers

Ideas and associations should be recorded in memos.

Due to anonymity, do not use names but use numbers from the encrypted table of respondents.

1. Set paragraph and line numbering (F4 and F5 does it automatically)
2. Make a separate paragraph for each contribution by each speaker.
3. Separate contributions of different speakers with a line space.
4. Transcribe even short interjections in a separate paragraph.
5. Insert time stamps at the end of each paragraph and, if needed, within paragraphs.
6. Include punctuation wherever possible to aid readability.
7. Transcribe the interviews as spoken (no improvements or embellishments). Retain the syntax, even if it contains grammatical errors.
8. Transcribe in Swiss-German, but follow German general spelling rules (e.g. capitalize nouns)
9. Dialect may be partially approximated to written German( if helpful for readability). For example: "ig" becomes "ich".
10. Phrases/idioms are reproduced literally, e.g. "übers Ohr hauen" (instead of: "über das Ohr hauen").
11. The interviewer is identified by an "I", the respondent by a "B".
12. Noises such as clearing the throat or stuttering are not transcribed.
13. Word doublings are only recorded if they are used for emphasis: "This is very, very important to me."
14. Signals of reception and fillers by all persons ("hm, yes, aha, uh", etc.) are only transcribed if it makes sense. This is the case, for example, when they are mentioned as a direct answer to a question. In such cases, after the particle "hm", write down a

description of the emphasis in brackets – affirmative, negative, pondering, questioning, feeling good – e.g. “hm (affirmative)”.

15. Emotional nonverbal expressions of the respondent and the interviewer that support or clarify the statement (such as laughter or sighs) are noted in brackets when used.
16. Several fillers in a row (only if conspicuous) are typed without punctuation marks in between (e.g. “uhm uhm uhm uhm so there we are ...”)

*Table S2: Guide for use of characters in transcription (translated from German)*

|                                |                                                                       |
|--------------------------------|-----------------------------------------------------------------------|
| /                              | Discontinuation of words and sentences                                |
| []                             | Missing piece of sentence or word                                     |
| (...)                          | Long pause; number of full stops approximately corresponds to seconds |
| (laughs)                       | Expression of emotion                                                 |
| ((Phone ringing))              | Event interrupting the interview                                      |
| <Toni> <Tonia>                 | Anonymous name                                                        |
| (unv.)                         | Incomprehensible (possibly write reason in brackets)                  |
| CAPITALS                       | Strong emphasis                                                       |
| hm                             | Hm (not: “h h h h m”, “m h m”, “h m h”)                               |
| ähm                            | Uhm (not: “ä m”, “e h m”, “ö h m”)                                    |
| Units                          | Write out. e.g. Euro, percent, meter                                  |
| Spoken characters              | Write out @ = ät                                                      |
| Abbreviations                  | As spoken                                                             |
| Quotation                      | Put quotation in quotation marks (And then I said “Well, let’s see”)  |
| you, I                         | In small letters                                                      |
| You, I (polite)                | In capitals                                                           |
| Anglicisms                     | Capitalize according to German spelling rules                         |
| V                              | Single letters are always capitalized                                 |
| Numerals from zero to twelve   | As words                                                              |
| Numerals from thirteen upwards | As numbers                                                            |
| 3,5<br>4 + 5 = 9               | Decimal numbers and mathematical equations always in figures          |
| 078 856 00 23                  | House numbers, page numbers, telephone numbers etc. as numbers        |
| Enumerations with letters      | “and we have A no time and B no money.”                               |

## References

1. Dresing, T.; Pehl, T. *Praxisbuch Interview, Transkription & Analyse: Anleitungen und Regelsysteme für qualitativ Forschende*; 6. Auflage.; Dr. Dresing und Pehl GmbH: Marburg, Germany, 2015; ISBN 978-3-8185-0489-2.

## 4 Guide for Content Analysis

### Guidelines for the researchers

1. Import the transcript of the interview into MAXQDA.
2. Add comments from interview transcript to document memo.
3. The first run of the interview is coded (deductively) according to the superordinate coding system (research questions). The deductive codes serve to structure and reduce the text content in such a way that the essential contents remain and are generously given to whole semantic units. For example, codes such as “mobility” are given to a whole section if everything in it is about mobility. But this is also about eliminating unnecessary text passages! Repeated words as well as decorative and clarifying elements are not marked; instead, indicate for further coding that these passages can be disregarded.
4. Assign deductive codes in the second run and create new codes if necessary. In this step, mark exactly those sentences or parts of sentences (semantic units) that correspond to the meaning of the code. In this way, the code can later be read and understood by the speaker.
5. Noteworthy thoughts are recorded in free memos or text memos when they come to mind (see below for more details about memos).

### Dealing with multiple coding

“If a category ‘previous rehab experiences’ was defined in a study with rehab patients, the same information (‘This is now my third rehab’) is usually only coded once. Of course, this does not apply to thematic categories, which are supposed to cover every mention of a topic, and also not if one attaches a substantive meaning to the repeated occurrence of the same information.”[1]

### Number of codes

“When choosing the scope of segment coding, the maxim ‘as much as necessary, as little as possible’ should be followed.”[1]

### Memos

Memos are created during the entire process of analysis. We distinguish between four types of memos: document memos, code memos, text memos, and free memos. Their uses are described in more detail below. For a detailed description of the use of memos in MAXQDA see <https://www.maxqda.com/max12-tutorial/c-memos-text-links>.



### **Document memos**

When importing transcribed interviews, the interview notes should be added to the document memos. These interview notes were recorded during or after the interview in the interview protocol (Protokoll\_Interview.docx) and saved afterwards with the personal data (see Personal Data.xlsx). The memo should also contain a brief description of the most important aspects of an interview or the most important idea about the interview, so as to provide a brief overview of each interview.

### **Code memos**

Code memos describe the use of a code. They include its definition, an anchor example, coding rules, and a reason for the code.

### **Free memos**

Free memos are used to record any thoughts that are not bound by a code or a text passage.

### **Text memos**

Text memos – similar to free memos – serve to record important thoughts. However, they each refer to a specific text passage.

## **References**

1. Kuckartz, U.; Rädiker, S. Analyzing Qualitative Data with MAXQDA: Text, Audio, and Video; Springer International Publishing: Basel, Switzerland, 2019; ISBN 978-3-030-15670-1

## 5 Codebook

Table S3: Original codebook with code name, code memo with coding rules, anchor examples (in Swiss German) and justification of each code

| Code                                                                                            | Title                      | Coding rule, example and justification in code memo                                                                                                                                                                                                                                                                                                                                                                                                                                                                                                                                                                                                                                                                                                                                                                                                                                                                                                                       |
|-------------------------------------------------------------------------------------------------|----------------------------|---------------------------------------------------------------------------------------------------------------------------------------------------------------------------------------------------------------------------------------------------------------------------------------------------------------------------------------------------------------------------------------------------------------------------------------------------------------------------------------------------------------------------------------------------------------------------------------------------------------------------------------------------------------------------------------------------------------------------------------------------------------------------------------------------------------------------------------------------------------------------------------------------------------------------------------------------------------------------|
| Einfluss auf NLQ<br>(Zusammenhänge)\<br>Status\Prozesse im Gange                                | Potenzielle<br>Fördernisse | <p><u>Kodierregel:</u> Aussagen darüber, dass Bemühungen und Prozesse für eine Verbesserung bez. N. oder LQ in Gange sind. Unabgeschlossen. Das Ziel ist noch nicht erreicht. Es geht darum, dass der Sprecher eine Bemühung um etwas benennt oder einen Prozess beschreibt (unabhängig ob als erfolgreich oder erfolglos bewertet). Keine Wünsche, keine vorhandenen Fördernisse für NLQ.</p> <p><u>Ankerbeispiel:</u> "Sie händ es par Aläuf gnoh, aber es isch halt schwierig."</p> <p><u>Begründung:</u> Der Code beschreibt Prozesse, welche von den SprecherInnen wahrgenommen werden und allenfalls auch bewertet werden.</p>                                                                                                                                                                                                                                                                                                                                      |
| Überprüfung Konzept NLQ\<br>Fördernisse und<br>Hindernisse\ Vorhandene<br>Fördernisse für (N)LQ | Vorhandene<br>Fördernisse  | <p><u>Kodierregel:</u> Alles, was als begünstigend/positiv für N oder LQ oder NLQ beschrieben wird. Es geht um "Tatsachen" in den Augen der Interviewten oder Sachlagen, um die Frage; was begünstigt NLQ?</p> <p>Unterscheidet sich vom Code "Gewünschter Beitrag" indem kein Wunsch, kein "sollte so sein", kein Handlungsvorschlag geäussert wird, sondern die Meinung darüber was gut, was schlecht für NLQ ist und ev. schon vorhanden ist oder auch unklar, ob vorhanden oder mehr oder weniger vorhanden. Kann ev. mit Code "Prozesse im Gange" kombiniert werden, sofern die Aussage ist, dass etwas NLQ fördert und man stets daran arbeitet, das stets tut.</p> <p><u>Begründung:</u> Dient der Forschungsfrage 2<br/>Fördernisse und Hemmnisse von NLQ. Welches sind aus Sicht der Bevölkerung Fördernisse, die NLQ begünstigen, wie könnten diese gestärkt werden und was sind Hemmnisse um NLQ zu verwirklichen und wie könnten diese vermindert werden?</p> |
| Überprüfung Konzept NLQ\<br>Fördernisse und<br>Hindernisse\ Vorhandene<br>Hindernisse für (N)LQ | Vorhandene<br>Hindernisse  | <p><u>Kodierregel:</u> Alles was sich nach Sicht der Person negativ auf N oder LQ oder NLQ auswirkt.</p> <p><u>Ankerbeispiele:</u> "Mir näméd meh vum Wald als mir chönd zruck geh." "Mir fahred viel Auto, wiel da fahrt dä Bus nöd all fuf Minute wie idä Stadt." "Flüge isch natürlich nöd guet, aber ich will ja öpis gseh vudä Welt."</p> <p><u>Begründung:</u> Dient der Forschungsfrage 2<br/>Fördernisse und Hemmnisse von NLQ Welches sind aus Sicht der Bevölkerung Fördernisse, die NLQ begünstigen, wie könnten diese gestärkt werden und was sind Hemmnisse um NLQ zu verwirklichen und wie könnten diese vermindert werden?</p>                                                                                                                                                                                                                                                                                                                             |
| Überprüfung Konzept<br>NLQ\ LQ                                                                  | LQ                         | <p><u>Kodierregel:</u> Alles was Thema LQ ist. Alles, was als LQ verstanden wird oder eben als keine LQ benannt wird. Muss nicht wörtlich als "Lebensqualität" genannt sein.</p>                                                                                                                                                                                                                                                                                                                                                                                                                                                                                                                                                                                                                                                                                                                                                                                          |
| Überprüfung Konzept<br>NLQ\ Aspekte                                                             | Aspekte                    | <p><u>Kodierregel:</u> Für alle Aspekte gilt: Textstellen, die auf eine Deutung des Aspekts hinweisen und die vom Sprecher für LQ als wichtig gesehen werden (unabhängig davon, ob als vorhanden bezeichnet oder bemängelt). Nicht zwingend wörtliche Nennung, sondern auch ähnliche Bedeutungen, die unter Aspekt gefasst werden können (zur Bedeutung der Aspekte siehe Memos). Nicht zwingend immer beide Begriffe genannt (Bspw. nicht Gesundheit</p>                                                                                                                                                                                                                                                                                                                                                                                                                                                                                                                 |

|                                                           |                           |                                                                                                                                                                                                                                                                                                                                                                                                                                                                                                                                                                                    |
|-----------------------------------------------------------|---------------------------|------------------------------------------------------------------------------------------------------------------------------------------------------------------------------------------------------------------------------------------------------------------------------------------------------------------------------------------------------------------------------------------------------------------------------------------------------------------------------------------------------------------------------------------------------------------------------------|
|                                                           |                           | und Sicherheit). Kann vom Sprecher auch nur im Kontext von LQ oder nur von N genannt werden.                                                                                                                                                                                                                                                                                                                                                                                                                                                                                       |
| Überprüfung Konzept NLQ\N                                 | N                         | <u>Kodierregel:</u> Es geht um das Thema N. Das heisst alles was zu N. erwähnt wird, als N verstanden wird, was als N. gemeint ist und alles was als nicht nachhaltig bezeichnet wird. Muss nicht zwingend wörtlich "Nachhaltigkeit" sein.                                                                                                                                                                                                                                                                                                                                         |
| Überprüfung Konzept NLQ\Aspekte\Gesundheit und Sicherheit | Gesundheit und Sicherheit | <u>Kodierregel:</u> Sprecher bezieht sich auf ein langes Leben, gesundes Leben, Gesundheit im allgemeinen, eine gute physische und psychische Verfassung, Sicherheit welche Basis für psychische und physische Gesundheit und Wohlbefinden ist<br><br><u>Begründung:</u> Abgleich mit Konzept NLQ. Was wird als wichtig gesehen für die Gesundheit.                                                                                                                                                                                                                                |
| Überprüfung Konzept NLQ\Aspekte\Wohnen                    | Wohnen                    | <u>Kodierregel:</u> Alles was Bauen, das Haus, die Wohnung, das Wohnen, die Möbel betrifft.<br><br><u>Begründung:</u> Abgleich Konzept NLQ (welche Aspekte gehören zu NLQ?), welche Bereiche widersprechen sich zu N.?                                                                                                                                                                                                                                                                                                                                                             |
| Überprüfung Konzept NLQ\Aspekte\Soziale Beziehungen       | Gleichstellung            | <u>Kodierregel:</u> Grösstmögliche Freiheit, Chancengleichheit, Gerechtigkeit, soziale Beziehungen, keine Benachteiligungen aufgrund des Geschlechts, der Ethnie, der Religion, der Spezies oder anderer Zugehörigkeit und Anerkennung potenziell ausgegrenzter Gruppen<br><br><u>Ankerbeispiel:</u> "Da kennt mä sich und hilft enand." "Da ischs nöd so anonym wie idä Stadt." "Familie git eim Halt."<br><br><u>Begründung:</u> Abgleich Konzept NLQ (welche Aspekte gehören zu NLQ?), oder welche Bereiche widersprechen sich zu N. oder LQ (kombiniert mit Code "Hindernis")? |
| Überprüfung Konzept NLQ\Aspekte\Natur/Landschaft          | Natur/Landschaft          | <u>Kodierregel:</u> Natur- und Landschaftsqualitäten werden genannt.<br><br><u>Ankerbeispiel:</u> "Mir händ da ä schöni Natur." Mir sind da Zmizt idä Natur."                                                                                                                                                                                                                                                                                                                                                                                                                      |
| Überprüfung Konzept NLQ\Aspekte\Partizipation             | Partizipation             | <u>Kodierregel:</u> Wahlfreiheit, Mitspracherecht, eine wirkungsvolle Beteiligung an gesellschaftlichen Prozessen, soziale Integration, Identifikation mit der Region.<br><br><u>Ankerbeispiel für Mitsprache:</u> "Ja da idä Schwiiz chönd mir ja über alles abstimme, wenn mir wönd."<br><br><u>Ankerbeispiel für Identifikation:</u> "Ich fühle mich da dihome." "Ich wet niene anders häre."                                                                                                                                                                                   |
| Überprüfung Konzept NLQ\Aspekte\Bildung/Wissen            | Bildung/Wissen            | <u>Kodierregel:</u> Eine gute Bildung allgemein, spezifisch zu Umwelt und Nachhaltigkeit, die Fähigkeit Informationen aufzunehmen und zu verarbeiten, kritisch zu denken und sich dem eigenen Wissen zu bedienen. Weiterbildung, eigene Bildung, gute Schulen.<br><br><u>Ankerbeispiel (negativ):</u> "Hochschule hnd mir halt da keini, da müend die Junge id Stadt."<br><br><u>Oder:</u> "Mä hät viel glernt idä Landwirtschaft. Dass mä än huufe Gift garnöd brucht."                                                                                                           |
| Überprüfung Konzept NLQ\Aspekte\Arbeit/Finanzielles       | Arbeit/Finanzielles       | <u>Kodierregel:</u> Eine Erwerbstätigkeit im Rahmen ressourcen- und umweltschonend betriebener Wirtschaft, die aufgrund von Wahlmöglichkeiten sinnstiftend ist, genügend Einkommen und ausgewogene Work-Life-Balance bietet.                                                                                                                                                                                                                                                                                                                                                       |

|                                                                            |                                  |                                                                                                                                                                                                                                                                                                                                                                                                                                                                                       |
|----------------------------------------------------------------------------|----------------------------------|---------------------------------------------------------------------------------------------------------------------------------------------------------------------------------------------------------------------------------------------------------------------------------------------------------------------------------------------------------------------------------------------------------------------------------------------------------------------------------------|
|                                                                            |                                  | <u>Ankerbeispiel Finanzielles:</u> "Da wüds denn halt knapp für üs als Familie"                                                                                                                                                                                                                                                                                                                                                                                                       |
|                                                                            |                                  | <u>Ankerbeispiel Arbeit:</u> "Ich schaffe gern mit Tier zäme." "Schaffe mues mä halt."                                                                                                                                                                                                                                                                                                                                                                                                |
| Überprüfung Konzept NLQ\Aspekte\Freizeit/Erholung                          | Freizeit/Erholung                | <u>Kodierregel:</u> Freizeitgestaltung, Erholung und kulturelle Betätigung die möglichst umweltschonend und mit dem Erhalt der erneuerbaren natürlichen Ressourcen vereinbar sind.                                                                                                                                                                                                                                                                                                    |
| Überprüfung Konzept NLQ\Aspekte\Mobilität                                  | Mobilität                        | <u>Kodierregel:</u> Öffentliche Verkehrsmittel (darunter Verbindungen, Vernetzung, Regelmässigkeit, Zugang), Fahrrad, zu Fuss gehen, Elektromobilität, Auto, Flugzeug, Schiff usw.                                                                                                                                                                                                                                                                                                    |
| Überprüfung Konzept NLQ\Aspekte\Neue Aspekte LQ                            | Neue Aspekte                     | <u>Kodierregel:</u> Etwas wird als wichtig für (N)LQ genannt, was noch nicht unter den Aspekten ist oder deutlich stärker/wichtiger als angenommen oder unter einem anderen Aspekt betrachtet.                                                                                                                                                                                                                                                                                        |
| Einfluss auf NLQ (Zusammenhänge)\ Akteur\ Eigenverantwortung des Einzelnen | Eigenverantwortung des Einzelnen | <u>Kodierregel:</u> Der Sprecher sieht nicht eine Instanz als verantwortlich für N, LQ oder für anderes, sondern die Individuen selbst sollen Verantwortung übernehmen. Bspw. liegt es am Individuum sich nachhaltig zu verhalten und die Frage, was die Behörden verbessern können wird aufgrund dessen kaum beantwortet, da der Sprecher nicht glaubt oder nicht daran denkt, dass Behörden oder andere Instanzen Alternativen und Unterstützung bieten können.                     |
|                                                                            |                                  | <u>Ankerbeispiel:</u> "Da soll sich jede mal selber ade Nase neh."                                                                                                                                                                                                                                                                                                                                                                                                                    |
|                                                                            |                                  | <u>Begründung:</u> Das Konzept NLQ basiert auf der Idee, dass Instanzen NLQ fördern: "Es beschreibt teilweise Ist-Zustände und zu einem grossen Teil Soll-Zustände mit den nötigen Entwicklungen, die wesentlich durch Institutionen, Politik und Staatsformen erreicht werden sollen (Frey & Steiner, 2012; Rawls, 1979), in dem diese in den ressourcenreichen Lebensbereichen Alternativen schaffen und in verschiedenen Lebensbereichen und Umweltbereichen Förderungen leisten." |
| Überprüfung Konzept NLQ\NLQ                                                | NLQ                              | <u>Kodierregel:</u> Alles was als N und LQ genannt wird. Im Zusammenhang.                                                                                                                                                                                                                                                                                                                                                                                                             |
|                                                                            |                                  | <u>Ankerbeispiel:</u> "Mä soll die Lebensqualität bringe, dass mä au mal dörf in Wald go brötle und ned nur dihome mues hocke und die Möglichkeite hät me do und ich denke das isch Lebensqualität und au nachhaltig fürd Region."                                                                                                                                                                                                                                                    |
|                                                                            |                                  | <u>Bedeutung:</u> Beantwortet auf direkteste Weise, was als NLQ angeschaut wird.                                                                                                                                                                                                                                                                                                                                                                                                      |
| Einfluss auf NLQ (Zusammenhänge)\ Akteur\ Gemeinde/Behörden                | Gemeinde                         | <u>Kodierregel:</u> Gemeinde ist eindeutig gemeint, Gemeinde wird genannt                                                                                                                                                                                                                                                                                                                                                                                                             |
| Einfluss auf NLQ (Zusammenhänge)\ Akteur\ Bund                             | Bund                             | <u>Kodierregel:</u> Bund ist gemeint oder wird genannt                                                                                                                                                                                                                                                                                                                                                                                                                                |
| Einfluss auf NLQ (Zusammenhänge)\ Akteur\ Unklare Instanz                  | Unklare Instanz                  | <u>Kodierregel:</u> Eine Instanz ist handlungsfähig, es ist aber unklar welche                                                                                                                                                                                                                                                                                                                                                                                                        |
| Überprüfung Konzept NLQ\Aspekte\Freizeit/Erholung\ Reisen ins Ausland      | Reisen ins Ausland               | <u>Kodierregel:</u> Alle Stellen, die darüber informieren, dass in der Welt herum gereist wurde/wird, die Lust wegzugehen, die Welt zu sehen oder auch Stellen die das Reisen ins Ausland zumindest thematisieren, z.B. auch, dass das nicht gemacht werden muss weil...                                                                                                                                                                                                              |
|                                                                            |                                  | <u>Ankerbeispiel:</u> "Ich ha wölle dWelt gseh und bi umegreist." "das wär ja öpps wo sochli dReiz oder dSchönheit vom eigeete Region kännelehre oder dor das velech äu mol do Ferie zmache, statt wiiter zreise."                                                                                                                                                                                                                                                                    |
|                                                                            |                                  | <u>Begründung:</u> Der Code informiert darüber, dass die Person auch andere Länder als die Schweiz gesehen hat und allenfalls, dass                                                                                                                                                                                                                                                                                                                                                   |

|                                                                                                                |                            |                                                                                                                                                                                                                                                                                                                                                                                                                                                                                                                                                                                                                                                     |
|----------------------------------------------------------------------------------------------------------------|----------------------------|-----------------------------------------------------------------------------------------------------------------------------------------------------------------------------------------------------------------------------------------------------------------------------------------------------------------------------------------------------------------------------------------------------------------------------------------------------------------------------------------------------------------------------------------------------------------------------------------------------------------------------------------------------|
|                                                                                                                |                            | diese Erfahrung wichtig war/ist. Desweiteren informiert der Code darüber, dass hier ein Widerspruch zur N. vorhanden ist (nicht aus subjektiver Sicht der Person sondern in der Interpretation)                                                                                                                                                                                                                                                                                                                                                                                                                                                     |
| Überprüfung Konzept<br>NLQ\Fördernisse und<br>Hindernisse\ Vorhandene<br>Fördernisse für<br>(N)LQ\Gelassenheit | Gelassenheit               | <p><u>Kodierregel:</u> Alles was wörtlich als "Gelassenheit" bezeichnet wird oder Synonym.</p> <p><u>Ankerbeispiel:</u> "Bi au gern wieder zugg choh, i die Glasseheit da."<br/>Begründung: Eine Stimmung wird beschrieben und ist allenfalls ein wichtiger Aspekt für (N)LQ.</p>                                                                                                                                                                                                                                                                                                                                                                   |
| Überprüfung Konzept<br>NLQ\Fördernisse und<br>Hindernisse\ Vorhandene<br>Hindernisse für (N)LQ\Dauer           | Dauer                      | <p><u>Kodierregel:</u> Die Zeit wird als Problem, als Hindernis genannt. Prozesse, Änderungen, Entwicklungen dauern zu lange. Im Unterschied zum Code "Zeit" ist dieser Code negativ.</p> <p><u>Ankerbeispiel:</u> "Es isch halt immer sone langwierigi Sach." Oder: "Es wird ja scho öpis gmacht, aber bis das mal chunt."</p> <p><u>Begründung:</u> Der Code drückt aus, was das Hinderniss ist.</p>                                                                                                                                                                                                                                              |
| Überprüfung Konzept<br>NLQ\Aspekte\Partizipation\<br>Identifikation                                            | Identifikation             | <p><u>Kodierregel:</u> Alles was eine Aussage zur eigenen Identifikation ist, egal ob positiv oder negativ. Egal durch was diese Identifikation ausgelöst wird. Keine wörtliche Nennung nötig.</p> <p><u>Ankerbeispiel:</u> "Ja da, bin ich natürlich hundert Prozent identifiziert. Än klare iheimische und halte au für eusi alte traditionelle Sache ähm (...) und bini verbunde und findi söll me au no chöne biphalte, also/."</p>                                                                                                                                                                                                             |
| Überprüfung Konzept<br>NLQ\Aspekte\Soziale<br>Beziehungen\Gleichstellung                                       | Gleichstellung             | <p><u>Kodierregel:</u> Alle Textstellen zur Gleichstellung zwischen allen Menschen, zwischen Geschlechtern, Nationalitäten, Barrierefreiheit, Tierschutz</p> <p><u>Ankerbeispiel:</u> "Es isch wichtig, dass es allne guet gaht." "Mir unterstützt Asylbewerbendi mit Sprachkurs."</p>                                                                                                                                                                                                                                                                                                                                                              |
| Überprüfung Konzept<br>NLQ\N\Intergenerativ                                                                    | Intergenerativ             | <p><u>Kodierregel:</u> Der Aspekt künftiger Generationen wird in irgendeiner Weise erwähnt. Man macht etwas oder denkt für künftige Generationen oder für die Zukunft der Erde.</p> <p><u>Ankerbeispiel:</u> "Eusi Nachkomme sölled die Natur da au no chöne gnüsse."</p> <p><u>Begründung:</u> Dass Ressourcen intergenerativ verteilt werden, ist Teil des Nachhaltigkeitsbegriff. Vielfach werden nicht alle Aspekte von N. erwähnt, aber bestimmte, die mit diesem Code gesammelt und ausdifferenziert werden können.</p>                                                                                                                       |
| Überprüfung Konzept<br>NLQ\N\Global                                                                            | Menschen anderer<br>Länder | <p><u>Kodierregel:</u> Effekte unseres Handelns auf andere Menschen woanders auf der Welt werden erwähnt. Das Befinden jener Menschen woanders auf der Welt wird erwähnt. Unterstützung für andere Länder wird erwähnt.</p> <p><u>Ankerbeispiel:</u> "Ich spend zwei mal im Jahr a NGO's wo Syrie unterstützt."<br/>"Das isch ja schoh verrückt, wie viel mir da händ und anderi nüt."</p> <p><u>Begründung:</u> Der Westen hat einen hohen Fussabdruck und die Auswirkungen können für andere Länder Benachteiligungen haben. Ausserdem ist es ein Aspekt von N. dass alle Menschen und nicht nur jene bestimmter Länder hohe LQ haben sollen.</p> |

|                                                                                                         |                                       |                                                                                                                                                                                                                                                                                                                                                                                   |
|---------------------------------------------------------------------------------------------------------|---------------------------------------|-----------------------------------------------------------------------------------------------------------------------------------------------------------------------------------------------------------------------------------------------------------------------------------------------------------------------------------------------------------------------------------|
| Überprüfung Konzept<br>NLQ\Aspekte\Gesundheit<br>und Sicherheit\Sport und<br>Bewegung                   | Sport und Bewegung                    | <u>Kodierregel:</u> Alle Formen von Aktivitäten die Bewegung fördern<br>oder hindern, Anreize für Sport und Bewegung, Wanderwege,<br>Fahrradwege, Sportvereine (können zusätzlich mit Code "soziale<br>Beziehungen" codiert werden).<br><br><u>Ankerbeispiel:</u> "ich cha grad da in Wald und dusse Sport mache."                                                                |
| Überprüfung Konzept<br>NLQ\Aspekte\Gesundheit<br>und Sicherheit\Luftqualität                            | Luftqualität                          | <u>Kodierregel:</u> Sprecher erwähnt Luft<br><br><u>Ankerbeispiel:</u> Mir hei da geuti Luft."                                                                                                                                                                                                                                                                                    |
| Überprüfung Konzept<br>NLQ\Aspekte\Gesundheit<br>und<br>Sicherheit\Lärmemissionen/R<br>uhe              | Lärmemissionen                        | <u>Kodierregel:</u> alle Arten von Lärm, Strassen-, Fluglärm usw. Oder<br>das Gegenteil, nämlich Ruhe.                                                                                                                                                                                                                                                                            |
| Überprüfung Konzept<br>NLQ\Aspekte\Gesundheit<br>und Sicherheit\Tageslicht                              | Lichtemissionen                       | <u>Kodierregel:</u> Sprecher erwähnt künstliches Licht, dass ev. störend<br>ist, von Strassenlaternen, Fussballstadion usw.                                                                                                                                                                                                                                                       |
| Überprüfung Konzept<br>NLQ\Aspekte\Gesundheit<br>und<br>Sicherheit\Sicherheit\Politisc<br>he Sicherheit | Politische Sicherheit                 | <u>Kodierregel:</u> Sprecher äussert sich über politische<br>Zusammenhänge bez. Sicherheit, Konflikte, Krieg, Frieden<br><br><u>Ankerbeispiel:</u> "Mir lönd da au Znacht Türe offe."                                                                                                                                                                                             |
| Überprüfung Konzept<br>NLQ\Aspekte\Gesundheit<br>und Sicherheit\Kriminalität                            | Kriminalität                          | <u>Kodierregel:</u> Sprecher äussert sich über Kleinkriminelles, über<br>Diebstahl, über Gewalt usw.<br><br><u>Ankerbeispiel:</u> "Mir chönd da au Znacht Türe offe lah, da chlaut<br>niemer öis."<br>"Es git immer wieder jungi wo Züg kaputt mached."                                                                                                                           |
| Überprüfung Konzept<br>NLQ\Aspekte\Soziale<br>Beziehungen\Konflikte/Friede<br>n                         | Zwischenmenschliche Konflikte         | <u>Kodierregel:</u> Sprecher erwähnt Konflikte, Streit mit Familie,<br>Nachbarn usw. Oder auch, dass keine Konflikte zu haben wichtig<br>sind oder sie nicht vorhanden sind                                                                                                                                                                                                       |
| Überprüfung Konzept<br>NLQ\Klimawandel\Klimaein<br>flüsse                                               | Klimaeinflüsse                        | <u>Kodierregel:</u> Sprecher geht davon aus, dass ein Ereignis/Umstand,<br>welches sich auf Gesundheit oder Sicherheit ausüben kann,<br>aufgrund Klima oder Klimawandel entsteht.                                                                                                                                                                                                 |
| Überprüfung Konzept<br>NLQ\Aspekte\Gesundheit<br>und Sicherheit\Gefühl:<br>Angst/Angstfrei/Sicherheit   | Gefühl:<br>Angst/Angstfrei/Sicherheit | <u>Kodierregel:</u> Code bezieht sich auf eine reine Äusserung über ein<br>Gefühl der Sicherheit, über Unsicherheit, Angst. Egal ob in<br>Zusammenhang der Gesundheit, politischer Konflikte,<br>Kriminalität usw.                                                                                                                                                                |
| Überprüfung Konzept<br>NLQ\Aspekte\Soziale<br>Beziehungen\Gleichstellung\<br>Gender                     | Gender                                | <u>Kodierregel:</u> Geschlechterverhältnisse zwischen allen<br>Geschlechtern, Ungleichheiten, Gleichheit, Sexualität<br><br><u>Ankerbeispiel:</u> "Frauen verdienen ja immer noch weniger als<br>Männer." (hier würde dann zusätzlich der Code "Einkommen"<br>vergeben und "Vorhandene Hindernisse")                                                                              |
| Überprüfung Konzept<br>NLQ\Aspekte\Arbeit/Finanzi<br>elles\Einkommen                                    | Einkommen                             | <u>Kodierregel:</u> alles was sich auf Einkommen bezieht, Probleme,<br>Mindesteinkommen, Vorteile (in diesen Fällen Code mit<br>Hindernisse und Fördernisse ergänzen), egal aus was sich das<br>ergibt oder nicht ergibt oder wie es sich zusammensetzt.                                                                                                                          |
| Überprüfung Konzept<br>NLQ\Aspekte\Arbeit/Finanzi<br>elles\Arbeitszeiten                                | Arbeitszeiten                         | <u>Kodierregel:</u> Alles was Teilzeit, Vollzeit ist, flexibel                                                                                                                                                                                                                                                                                                                    |
| Überprüfung Konzept<br>NLQ\Aspekte\Soziale<br>Beziehungen\Gleichstellung\<br>ZuzügerInnen\Integration   | Immigration                           | <u>Kodierregel:</u> Alles was Offenheit gegenüber und Bemühungen für<br>Fremde beschreibt oder den Vorgang oder die Problematik von<br>Immigration, Integration beschreibt, egal ob bez. AusländerInnen<br>oder SchweizerInnen aus anderen Gegenden. Negativ und positiv                                                                                                          |
| Überprüfung Konzept<br>NLQ\Aspekte\Soziale<br>Beziehungen\Gleichstellung\<br>ZuzügerInnen\Nationalismus | Nationalismus                         | <u>Kodierregel:</u> starke Solidarisierung mit SchweizerInnen, die<br>Andere davon ausschliessen möchte in der Schweiz zu leben oder<br>zu arbeiten. Nationalstaatliches Denken.<br><br><u>Ankerbeispiel:</u> "Wir müssen zuerst schauen, dass es uns gut geht."<br>"Wir haben nicht so viel Platz, dass hier noch mehr Personen<br>kommen."<br>"Bald sterben wir Schweizer aus." |

|                                                                                                                                          |                                       |                                                                                                                                                                                                                                                                                                                |
|------------------------------------------------------------------------------------------------------------------------------------------|---------------------------------------|----------------------------------------------------------------------------------------------------------------------------------------------------------------------------------------------------------------------------------------------------------------------------------------------------------------|
| Überprüfung Konzept<br>NLQ\Aspekte\Soziale<br>Beziehungen\Gleichstellung\<br>ZuzügerInnen\Nationalismus<br>\Vorbehalte ggü. Fremden      | Vorbehalte ggü.<br>Fremden            | <u>Kodierregel:</u> Sprecher äussert sich nicht als fremdenfeindlich, aber auch nicht direkt offen. Fremde sind unter bestimmten Umständen und Bedingungen willkommen. Manche Fremde werden akzeptiert. Vorfälle haben zu Misstrauen ggü. manchen Fremden geführt.                                             |
| Überprüfung Konzept<br>NLQ\Aspekte\Soziale<br>Beziehungen\Gleichstellung\<br>Barrierefreiheit                                            | Barrierefreiheit                      | <u>Kodierregel:</u> Alle Arten Erwähnung von Barrierefreiheit oder der Hinderung dessen. Dies kann sich auf körperliche, psychische Behinderungen geburts-, genetisch-, krankheits-, unfall- oder altersbedingte Behinderungen beziehen.                                                                       |
| Überprüfung Konzept<br>NLQ\Aspekte\Soziale<br>Beziehungen\Gleichstellung\<br>Tiere/Tierwohl                                              | Tierwohl                              | <u>Kodierregel:</u> Alles was das Wohl von Tieren einbezieht, Rücksicht auf Tiere, Tierschutz, Tierethik                                                                                                                                                                                                       |
| Überprüfung Konzept<br>NLQ\Aspekte\Soziale<br>Beziehungen\Soziale<br>Isolation/Ausgrenzung/Distanzierung                                 | Soziale<br>Isolation/Ausgrenzung      | <u>Kodierregel:</u> Alle Äusserungen über das Gefühl ausgeschlossen zu sein oder alleine zu sein.                                                                                                                                                                                                              |
| Überprüfung Konzept NLQ\2<br>Fördernisse und<br>Hindernisse\Vorhandene<br>Fördernisse für<br>(N)LQ\Umwelt- und<br>Nachhaltigkeitsbildung | Umwelt- und<br>Nachhaltigkeitsbildung | <u>Kodierregel:</u> Alle Erwähnungen von Bildung/Aktivitäten in Umwelt, Tierwelt, Biodiversität, Klima und Nachhaltigkeit ist.                                                                                                                                                                                 |
| Überprüfung Konzept<br>NLQ\Aspekte\Bildung/Wissen\Marketing/Werbung                                                                      | Marketing                             | <u>Kodierregel:</u> Dinge, die verbreitet werden um Werbung zu machen oder die vermarktet werden sollen.                                                                                                                                                                                                       |
| Überprüfung Konzept<br>NLQ\Aspekte\Bildung/Wissen\Ausbildungsorte                                                                        | Ausbildungsinstitutionen              | <u>Kodierregel:</u> Alle Arten von Schulen, Ausbildungsorte, Weiterbildungen                                                                                                                                                                                                                                   |
| Überprüfung Konzept<br>NLQ\Aspekte\Bildung/Wissen\Transparenz                                                                            | Transparenz/Information               | <u>Kodierregel:</u> Eine Instanz, Institution informiert genügend, zeigt sich transparent, gibt Einsicht in Geschehen und Tun oder auch eben nicht. Oder Transparenz wird in irgend einer anderen Art angesprochen.                                                                                            |
| Überprüfung Konzept<br>NLQ\Aspekte\Freizeit/Erholung\Kulturangebot                                                                       | Kulturanlässe                         | <u>Kodierregel:</u> Angebot an kulturellen Orten oder Veranstaltungen, Feste, Ausstellungen, Musik, Traditionelles oder Modernes.                                                                                                                                                                              |
| Überprüfung Konzept<br>NLQ\Aspekte\Freizeit/Erholung\Infrastruktur für Kultur                                                            | Infrastruktur für Kultur              | <u>Kodierregel:</u> Gebäude, Finanzielles oder anderes zur Infrastruktur für Kultur wird erwähnt.                                                                                                                                                                                                              |
| Überprüfung Konzept<br>NLQ\N\Abfall/Entsorgung                                                                                           | Abfall/Entsorgung                     | <u>Kodierregel:</u> Alles was mit Abfallproduktion/Verminderung zu tun hat, Entsorgung, Recycling, Materialien, die entsorgt werden müssen.                                                                                                                                                                    |
| Überprüfung Konzept<br>NLQ\Aspekte\Partizipation\Regionale Kultur Tradition                                                              | Regionale Kultur                      | <u>Ankerbeispiel:</u> "Ich trenne immer alles."<br><u>Kodierregel:</u> Alles was regionale Kultur beinhaltet, als Förderung, als Veranstaltung, auch in negativer Form als verschwindend                                                                                                                       |
| Überprüfung Konzept<br>NLQ\Aspekte\Partizipation\Geschichte und Aufarbeitung                                                             | Geschichte und Aufarbeitung           | <u>Kodierregel:</u> Themen in Ausstellungen Angebote mit regionalen, historischen Bezügen, siehe auch „Freizeit und Erholung“ und „Bildung“<br><br><u>Begründung:</u> Aufarbeitung und Erhalt der lokalen Geschichte kann zum Wissen beitragen und damit die Identität und den Zusammenhalt der Region stärken |
| Überprüfung Konzept<br>NLQ\Aspekte\Soziale<br>Beziehungen\Gleichstellung\<br>Umweltgerechtigkeit                                         | Umweltgerechtigkeit                   | <u>Kodierregel:</u> Mietpreis, starke Umweltbelastung in der Nähe des Wohnorts (Entsorgungsstelle Sonderabfälle, Atomkraftwerk usw.)<br><br><u>Begründung:</u> Der Code bezweckt Umweltgerechtigkeit/Ungerechtigkeit festzustellen.                                                                            |
| Überprüfung Konzept<br>NLQ\Aspekte\Mobilität\ÖV<br>\Vernetzung ÖV\Haltestellen<br>ÖV                                                     | Haltestellen                          | <u>Kodierregel:</u> Distanz zur Haltestelle bzw. Erreichbarkeit, Anzahl der Haltestellen                                                                                                                                                                                                                       |

|                                                                                                                                                        |                                            |                                                                                                                                                                                                                                                                                                                                                                                                                                                                                                                 |
|--------------------------------------------------------------------------------------------------------------------------------------------------------|--------------------------------------------|-----------------------------------------------------------------------------------------------------------------------------------------------------------------------------------------------------------------------------------------------------------------------------------------------------------------------------------------------------------------------------------------------------------------------------------------------------------------------------------------------------------------|
| Überprüfung Konzept<br>NLQ\Aspekte\Mobilität\ÖV<br>\Vernetzung ÖV                                                                                      | Vernetzung                                 | <u>Kodierregel:</u> Ausbau des Netzes, Abdeckung von Strecken und Orten                                                                                                                                                                                                                                                                                                                                                                                                                                         |
| Überprüfung Konzept<br>NLQ\Aspekte\Mobilität\ÖV<br>\Fahrplan ÖV                                                                                        | Fahrplan ÖV                                | <u>Kodierregel:</u> Häufigkeit und Zeiten der Fahrten werden angesprochen                                                                                                                                                                                                                                                                                                                                                                                                                                       |
| Überprüfung Konzept<br>NLQ\Aspekte\Mobilität\ÖV<br>\Ruftaxi                                                                                            | Ruftaxi                                    | <u>Kodierregel:</u> Eine Möglichkeit, ein Ruftaxi anzufordern oder andere öffentliche/offizielle Kleinbusse/Sharing Möglichkeiten werden angesprochen.                                                                                                                                                                                                                                                                                                                                                          |
| Überprüfung Konzept<br>NLQ\Aspekte\Arbeit/Finanzen<br>\Tourismus                                                                                       | Einkommen durch<br>Tourismus               | <u>Kodierregel:</u> Tourismus wird im Zusammenhang von Einkommen erwähnt                                                                                                                                                                                                                                                                                                                                                                                                                                        |
| Überprüfung Konzept NLQ\2<br>Fördernde und<br>Hindernisse\Vorhandene<br>Fördernde für<br>(N)LQ\Regionale Rohstoffe<br>(Holz etc.) (N)                  | Vermarktung von<br>regionalen<br>Produkten | <u>Kodierregel:</u> Alles was Einkommen durch regionale Produkte bringen soll/kann/tut. Egal welche Art von Produkten, Lebensmittel, Industrie, Forstwirtschaft usw.                                                                                                                                                                                                                                                                                                                                            |
| Überprüfung Konzept<br>NLQ\Aspekte\Freizeit/Erholung<br>\Spiritualität / Religion                                                                      | Spiritualität /<br>Religion                | <u>Kodierregel:</u> Alle Arten der Erwähnung, auch Orte und Infrastruktur                                                                                                                                                                                                                                                                                                                                                                                                                                       |
| Überprüfung Konzept<br>NLQ\Aspekte\Mobilität\Fliegen                                                                                                   | Fliegen                                    | <u>Kodierregel:</u> Alle Erwähnungen zu Fliegen, Flugzeuge, Flugverkehr, Kerosin usw.                                                                                                                                                                                                                                                                                                                                                                                                                           |
| Überprüfung Konzept<br>NLQ\Aspekte\Neue Aspekte<br>LQ\Trends                                                                                           | Trends                                     | <u>Kodierregel:</u> Etwas wird als Trend prophezeit oder als noch nicht angekommen oder als aktuell vorhanden erwähnt. Muss je nach dem mit Vorhandenem Fördernde/Hindernis oder gewünschter Beitrag ergänzt werden.<br><br><u>Ankerbeispiel:</u> "Es gibt ja jetzt immer mehr diese Abfallfreien Läden in den Städten, hier ist das noch nicht angekommen."<br><br><u>Begründung:</u> Der Code zeigt welche Trends wahrgenommen werden, als in der Region nicht vorhanden erklärt werden oder erwünscht werden |
| Überprüfung Konzept NLQ\2<br>Fördernde und<br>Hindernisse\Schutz Gebäude<br>schränkt ein (N oder LQ)                                                   | Schützenswerter<br>Gebäude                 | <u>Kodierregel:</u> Gebäude werden erwähnt, die aufgrund historischem oder kulturellem, traditionellem Wert schützenswert sind. Erwähnung ist ausreichend auch Kann auch bei Ablehnung                                                                                                                                                                                                                                                                                                                          |
| Überprüfung Konzept<br>NLQ\Aspekte\Wohnen\Gärten                                                                                                       | Gärten                                     | <u>Kodierregel:</u> Alles was mit Gärtnern, Gärten erwähnt wird                                                                                                                                                                                                                                                                                                                                                                                                                                                 |
| Überprüfung Konzept NLQ\2<br>Fördernde und<br>Hindernisse\Vorhandene<br>Hindernisse für<br>(N)LQ\Bauweisen\Zersiedelung<br>Bodenversiegelung           | Zersiedelung                               | <u>Kodierregel:</u> Jegliche Erwähnung von Bauarten, die zersiedelt sind, zu viel Fläche benötigen oder sonst verteilt sind                                                                                                                                                                                                                                                                                                                                                                                     |
| Überprüfung Konzept NLQ\2<br>Fördernde und<br>Hindernisse\Vorhandene<br>Fördernde für<br>(N)LQ\Bauweisen\Siedlungsstruktur/Ortsbild\Verdichtetes Bauen | Verdichtetes Bauen                         | <u>Kodierregel:</u> Erwähnung von verdichtetem Bauen, welches die Verbauung von Land verhindern soll, welches platzsparend ist                                                                                                                                                                                                                                                                                                                                                                                  |
| Überprüfung Konzept<br>NLQ\Aspekte\Natur/Landschaft<br>\Landschaft\Landschaftsbild                                                                     | Landschaftsbild                            | <u>Kodierregel:</u> Äusserungen und Empfindungen zur Ästhetik der Landschaft                                                                                                                                                                                                                                                                                                                                                                                                                                    |
| Überprüfung Konzept<br>NLQ\Aspekte\Natur<br>(Erwähnung)                                                                                                | Natur                                      | <u>Kodierregel:</u> Sie wird erwähnt als z.B. vorhanden, als üppig oder weitreichend usw. Aber im Gegensatz zu "Intakte Natur" ev. ohne genaue Bezeichnung wie diese Natur ist, in welchem Zustand.                                                                                                                                                                                                                                                                                                             |
| Überprüfung Konzept NLQ\2<br>Fördernde und<br>Hindernisse\Vorhandene<br>Hindernisse für                                                                | Bauland                                    | <u>Kodierregel:</u> Alles was Bauland betrifft, kaufen, verkaufen, Verfügbarkeit, Preis                                                                                                                                                                                                                                                                                                                                                                                                                         |



|                                                                                                                  |                              |                                                                                                                                                                                                                                                                                                                                                                                                                                                                                                                                                                                                                                                                                                                                                                                   |
|------------------------------------------------------------------------------------------------------------------|------------------------------|-----------------------------------------------------------------------------------------------------------------------------------------------------------------------------------------------------------------------------------------------------------------------------------------------------------------------------------------------------------------------------------------------------------------------------------------------------------------------------------------------------------------------------------------------------------------------------------------------------------------------------------------------------------------------------------------------------------------------------------------------------------------------------------|
| (N)LQ\Kosten\Bauland zu teuer/rar                                                                                |                              | <u>Ankerbeispiel:</u> "Aso de Bodepriis isch nid so tür, de isch öppe bi 400Fr. "                                                                                                                                                                                                                                                                                                                                                                                                                                                                                                                                                                                                                                                                                                 |
| Überprüfung Konzept<br>NLQ\Aspekte\Arbeit/Finanzielles\Arbeit<br>(Bezeichnung/Inhalt)                            | Arbeit                       | <u>Kodierregel:</u> Inhalt der Arbeit oder Beruf wird genannt, erfüllend nicht erfüllend, wichtig, nebensächlich, alle möglichen Themen die den Inhalt der Arbeit betreffen<br><br><u>Ankerbeispiel:</u> "Ja, ich bin hier Pfarrer für die ganze Umgebung"                                                                                                                                                                                                                                                                                                                                                                                                                                                                                                                        |
| Überprüfung Konzept<br>NLQ\Aspekte\Partizipation\Selbstbestimmung                                                | Selbstbestimmung             | <u>Kodierregel:</u> Alles was das eigene, unabhängige und individuelle Entscheiden betrifft. Die Freiheit sein eigenes Leben selbst- und nicht fremd zu bestimmen. Selbstbestimmung, kein Zwang sich einer Gruppe/Meinung/Organisation anschliessen zu müssen. Mündigkeit, Ungebundenheit.<br><br><u>Ankerbeispiel:</u> "Ich ha welle unabhängig si, aso i bi äü unabhängig bliibe"                                                                                                                                                                                                                                                                                                                                                                                               |
| Überprüfung Konzept<br>NLQ\N\Ressourcen                                                                          | Ressourcen                   | <u>Kodierregel:</u> Im Zusammenhang N. wird der Ressourcenverbrauch thematisiert.<br><br><u>Ankerbeispiel:</u> "Wir reden ja immer davon, wie viel wir überhaupt verbrauchen dürfen."                                                                                                                                                                                                                                                                                                                                                                                                                                                                                                                                                                                             |
| Überprüfung Konzept<br>NLQ\Aspekte\Mobilität\ÖV\Tarif ÖV                                                         | Tarif ÖV                     | <u>Kodierregel:</u> Alle Erwähnungen zu Preise und Tarife in ÖV                                                                                                                                                                                                                                                                                                                                                                                                                                                                                                                                                                                                                                                                                                                   |
| Überprüfung Konzept<br>NLQ\Aspekte\Mobilität\ÖV                                                                  | ÖV                           | <u>Kodierregel:</u> Allgemeines zum ÖV, die Erwähnung dessen, dass sie genutzt wird oder auch nicht                                                                                                                                                                                                                                                                                                                                                                                                                                                                                                                                                                                                                                                                               |
| Überprüfung Konzept NLQ\2<br>Fördernde und<br>Hindernisse\Vorhandene<br>Fördernde für<br>(N)LQ\Mobility          | Mobility                     | <u>Kodierregel:</u> Alle Arten von Autos die als Sharing bezeichnet werden können und gemietet werden können                                                                                                                                                                                                                                                                                                                                                                                                                                                                                                                                                                                                                                                                      |
| Überprüfung Konzept<br>NLQ\Aspekte\Soziale<br>Beziehungen\Familie                                                | Familie                      | <u>Kodierregel:</u> Alle Erwähnungen von der Familie, vom Familienleben, Kindererziehung, Verwandtschaft                                                                                                                                                                                                                                                                                                                                                                                                                                                                                                                                                                                                                                                                          |
| Überprüfung Konzept NLQ\2<br>Fördernde und<br>Hindernisse\Vorhandene<br>Hindernisse für<br>(N)LQ\Überbevölkerung | Überbevölkerung              | <u>Kodierregel:</u> Die Bevölkerungszahl, zunehmende Bevölkerung, Menschenmassen usw. werden hier, woanders oder global als Problem genannt. Im Zusammenhang zu N oder LQ. Kann allenfalls bei nationalistischen Äusserungen auch auftreten. Dann Code "Nationalismus" und "Überbevölkerung" verwenden.<br><br><u>Ankerbeispiel:</u> "Ossert sisch eifach, dasses immer meh Mänsche gitt of dere Wält ond immer meh Mänsche ,wo i eusem Land läbed ond dor das sich denn halt äü/ Je meh Mänsche amene Ort sind, desto schweriger werd mängisch äü sZämeläbe, oder, das isch jo eigentlich e logischi Folg druus."<br><br><u>Begründung:</u> Vielfach wir Überbevölkerung als Problem für N. genannt, als Begründung für Umweltprobleme oder als Problem von Entwicklungsländern. |
| Überprüfung Konzept<br>NLQ\Aspekte\Freizeit/Erholung\Erholung/Entspannung                                        | Erholung/Entspannung         | <u>Kodierregel:</u> Erwähnung von Bedürfnis, Tätigkeit, Wunsch nach Entspannung oder Erholung<br><br><u>Ankerbeispiel:</u> "Ja sUmfeld also dLebesqualität am Ort, dErholung während der Nachttragszit (Feierabend?) dass me cha ruig häre hocke und chli ruie."                                                                                                                                                                                                                                                                                                                                                                                                                                                                                                                  |
| Überprüfung Konzept<br>NLQ\Aspekte\Mobilität\Strassenverkehr                                                     | Strassenverkehr              | <u>Kodierregel:</u> Erwähnung von Autoverkehr, Strassen, Stau, übermässigem verkehr                                                                                                                                                                                                                                                                                                                                                                                                                                                                                                                                                                                                                                                                                               |
| Überprüfung Konzept<br>NLQ\Aspekte\Arbeit/Finanzielles\Finanzielles ist zweitrangig                              | Finanzielles ist zweitrangig | <u>Kodierregel:</u> Geld wird nicht als das erste Wichtige eingestuft, Geld wird als nebensächlich bezeichnet, andere Dinge werden als wichtiger genannt.<br><br><u>Ankerbeispiel:</u> "Wenns eim sus wohl isch mues sFinanzielle nöd immer am höchste Ort sii"                                                                                                                                                                                                                                                                                                                                                                                                                                                                                                                   |

|                                                                                                                                                                         |                                  |                                                                                                                                                                                                                                                                                                                                                                                                                                                                                                                                                                                                                                           |
|-------------------------------------------------------------------------------------------------------------------------------------------------------------------------|----------------------------------|-------------------------------------------------------------------------------------------------------------------------------------------------------------------------------------------------------------------------------------------------------------------------------------------------------------------------------------------------------------------------------------------------------------------------------------------------------------------------------------------------------------------------------------------------------------------------------------------------------------------------------------------|
| Überprüfung Konzept<br>NLQ\Aspekte\Soziale<br>Beziehungen\Zusammenhalt                                                                                                  | Zusammenhalt                     | <u>Kodierregel:</u> Menschliche Beziehungen egal welcher Form werden als enger Zusammenhalt beschrieben                                                                                                                                                                                                                                                                                                                                                                                                                                                                                                                                   |
| Überprüfung Konzept<br>NLQ\Aspekte\Soziale<br>Beziehungen\Gleichstellung\<br>ZuzügerInnen                                                                               | Ausländer                        | <u>Kodierregel:</u> Ausländer (oder auch AsylantInnen) werden verwöhnt, weder nationalistisch noch im immigrierenden Sinn.                                                                                                                                                                                                                                                                                                                                                                                                                                                                                                                |
| Überprüfung Konzept<br>NLQ\Aspekte\Soziale<br>Beziehungen\Gleichstellung\<br>ZuzügerInnen\Nationalismus<br>\Vorbehalte ggü.<br>Fremden\Anpassung an<br>Schweizer Kultur | Anpassung an<br>Schweizer Kultur | <u>Kodierregel:</u> Es wird erwartet, dass sich AusländerInnen anpassen bzw. dies wird als Voraussetzung für ihre Akzeptanz genannt.<br><br><u>Ankerbeispiel:</u> "solang me sich mitenand find, vor allem im usländische Bereich wenn me sich mitenand find und sich eusere Kultur apasst han ich überhaupt kei Berüerigspunkt."                                                                                                                                                                                                                                                                                                         |
| Überprüfung Konzept<br>NLQ\Aspekte\Partizipation\<br>Kommunikation                                                                                                      | Kommunikation                    | <u>Kodierregel:</u> Eine Form von Kommunikation wird angesprochen, zwischenmenschlich, mit technischen Hilfsmitteln oder ohne<br><br><u>Ankerbeispiel:</u> "S Mitspracherecht find ich eigentlich söll mer ha, aber sProblem isch meistens nöd sMitspracherecht sondern meistens isch sProblem dKommunikation. Grad idä politische Siite, wenn me guet kommuniziert isch au dMitsprach da und wenn me ned guet komminiziert denn irgend einisch läuft me ane Wand ue."<br><br><u>Begründung:</u> Der Code zeigt Stellen auf bei denen Kommunikation ein Problem oder Hindernis für etwas darstellt, gewünscht wird oder auch gelobt wird. |
| Einfluss auf NLQ<br>(Zusammenhänge)\<br>Akteur\Politik/Politiker                                                                                                        | Politik/Politiker                | <u>Kodierregel:</u> Politik, Politiker werden in irgendeinem Zusammenhang erwähnt. Auch Demokratie, politische Abläufe.                                                                                                                                                                                                                                                                                                                                                                                                                                                                                                                   |
| Überprüfung Konzept<br>NLQ\Aspekte\Natur/Landsc<br>haft\Landschaft                                                                                                      | Landschaft                       | <u>Kodierregel:</u> Die Landschaft wird beschriebe, erwähnt. Unabhängig davon ob intakte Natur vorhanden ist oder N.                                                                                                                                                                                                                                                                                                                                                                                                                                                                                                                      |
| Überprüfung Konzept<br>NLQ\Aspekte\Arbeit/Finanzi<br>elles\Finanzielles (wichtig)                                                                                       | Finanzielles als<br>wichtig      | <u>Kodierregel:</u> Finanzielles wird als Motivation für etwas genannt, als etwas das begehrt wird, als etwas das eine Thematik negiert, von dem man oder etwa abhängig ist usw.                                                                                                                                                                                                                                                                                                                                                                                                                                                          |
| Überprüfung Konzept<br>NLQ\Aspekte\Natur/Landsc<br>haft\Landwirtschaft                                                                                                  | Landwirtschaft                   | <u>Kodierregel:</u> Landwirtschaft wird als Thema genannt, ev. im Zusammenhang mit N. oder anderem wie Lebensmittel etc.                                                                                                                                                                                                                                                                                                                                                                                                                                                                                                                  |
| Überprüfung Konzept<br>NLQ\Aspekte\Wohnen\Eige<br>nheim                                                                                                                 | Eigentum                         | <u>Kodierregel:</u> Eigentumswohnungen oder Eigentumshäuser werden erwähnt                                                                                                                                                                                                                                                                                                                                                                                                                                                                                                                                                                |
| Überprüfung Konzept<br>NLQ\Aspekte\Gesundheit<br>und Sicherheit\Gesundheit<br>(physisch)                                                                                | Gesundheit                       | <u>Kodierregel:</u> es geht um die eigene körperliche/physische Gesundheit, oder die von anderen, kann auch Krankheit sein. Unterscheidet sich aber von "Barrierefreiheit" weil es um die körperliche Verfassung geht und nicht um Infrastruktur.                                                                                                                                                                                                                                                                                                                                                                                         |
| Überprüfung Konzept<br>NLQ\Aspekte\Gesundheit<br>und Sicherheit\Gesundheit<br>(psychisch)                                                                               | Gesundheit<br>(psychisch)        | <u>Kodierregel:</u> Eine psychische Krankheit wird angesprochen, wie Depression oder Therapien, Therapeuten. Psychologie etc.                                                                                                                                                                                                                                                                                                                                                                                                                                                                                                             |
| Überprüfung Konzept<br>NLQ\Aspekte\Wohnen\Meh<br>rfamilienhäuser                                                                                                        | Mehrfamilienhäuser               | <u>Kodierregel:</u> Häuser in denen mehrere Parteien drinnen wohnen können                                                                                                                                                                                                                                                                                                                                                                                                                                                                                                                                                                |
| Überprüfung Konzept NLQ\<br>Fördernisse und<br>Hindernisse\Vorhandene<br>Fördernisse für<br>(N)LQ\Bewusstsein/Verantwo<br>rtungsvolles Verhalten (N)                    | Bewusstsein                      | <u>Kodierregel:</u> Eine Form von Bewusstsein über Umwelt und N. wird angesprochen, unabhängig davon woher dieses kommt.                                                                                                                                                                                                                                                                                                                                                                                                                                                                                                                  |
| Überprüfung Konzept<br>NLQ\Aspekte\Wohnen\Rau<br>m(Nutzung)                                                                                                             | Genügend Raum                    | <u>Kodierregel:</u> Im Sinne von Dimension, Umfang, Platz, Räumen, Raumgefühl, eingeengt oder nicht eingeengt sein, Weite.<br><br><u>Ankerbeispiel:</u> "Mir isch wichtig, dass ich mis eigde Umfeld ha und ned irgendwo igängt bi"                                                                                                                                                                                                                                                                                                                                                                                                       |
| Überprüfung Konzept<br>NLQ\Klimawandel                                                                                                                                  | Klimawandel                      | <u>Kodierregel:</u> Es wird Klimaerwärmung oder Klimaveränderung/Wandel erwähnt.                                                                                                                                                                                                                                                                                                                                                                                                                                                                                                                                                          |

|                                                                                                                                                        |                                         |                                                                                                                                                                                                                                                                                                                                                                                                                                                                                                                                                    |
|--------------------------------------------------------------------------------------------------------------------------------------------------------|-----------------------------------------|----------------------------------------------------------------------------------------------------------------------------------------------------------------------------------------------------------------------------------------------------------------------------------------------------------------------------------------------------------------------------------------------------------------------------------------------------------------------------------------------------------------------------------------------------|
| Überprüfung Konzept NLQ\<br>Fördernisse und<br>Hindernisse\ Vorhandene<br>Hindernisse für<br>(N)LQ\ Pestizide/Chemie/Dün-<br>ger                       | Pestizide/Chemie                        | <u>Kodierregel:</u> Irgendwelche als nichtnachhaltig eingeschätzte Chemikalien werden angesprochen, die dazu dienen Schädlinge, Pilze oder anderes zu bekämpfen.<br><br><u>Ankerbeispiel:</u> sGanze ir Landwirtschaft isch natürlich irgendwie die ganzi Chemie wome isetzt alles zäme das wird ob jetzt das Tierarzt oder bide Medizin mit däne Hormon und dä Substanze, chemische Substanze wome isetzt oder ebä jaa vor allem dHormon wo nacher vor allem id Abwasser sii.                                                                     |
| Überprüfung Konzept<br>NLQ\ Aspekte\ Arbeit/Finanzi-<br>elles\ Preis\ Produktpreis                                                                     | Produktpreis                            | <u>Kodierregel:</u> Der Wert eines Produktes wird erwähnt. Es wird als unverhältnismässig bezeichnet oder auch als verhältnismässig. Es geht darum, ob für etwas genug oder zu wenig bezahlt wird. Preis-/ Leistungsverhältnis bezüglich Produkte, aus Sicht der Konsumenten oder auch Hersteller.<br><br><u>Ankerbeispiel:</u> "ich hoffe eifach, dass eis mal ändered, dass vilicht die landwirtschaftliche produkt meh gschätzt werded, was halt au idä hütige Ziit/ ich weiss ned wie viel oder wie WENig, dass mä usgiit fürd Nahrismittel. " |
| Einfluss auf NLQ<br>(Zusammenhänge)\<br>Akteur\ Bevölkerung                                                                                            | Bevölkerung                             | <u>Kodierregel:</u> Die Bevölkerung oder Gesellschaft ist gemeint.                                                                                                                                                                                                                                                                                                                                                                                                                                                                                 |
| Überprüfung Konzept<br>NLQ\ Aspekte\ Neue Aspekte<br>LQ\ Wetterbedingungen                                                                             | Wetterbedingungen                       | <u>Kodierregel:</u> Es wird über das Wetter an und für sich, über einen Einfluss, der durch das Wetter generiert wird, das Wetterverhalten gesprochen.                                                                                                                                                                                                                                                                                                                                                                                             |
| Einfluss auf NLQ<br>(Zusammenhänge)\<br>Akteur\ Grossverteiler/Wirtsc-<br>haftsmächte                                                                  | Grosshändler/Wirtsc-<br>haftsmächte     | <u>Kodierregel:</u> Ein Akteur der wirtschaftlich stark, mächtig ist und Einfluss auf z.B. NLQ haben kann.<br><br><u>Ankerbeispiel:</u> "Bedingige vo de Grosshändler sind natürlich äu immer höch, aso die stelled äu grossi Aaforderige, aso wenn en Öpfel en chline Dumpf hett, dänn fällt de grad use"                                                                                                                                                                                                                                         |
| Überprüfung Konzept<br>NLQ\ Aspekte\ Gesundheit<br>und Sicherheit\ Medizin                                                                             | Medizin                                 | <u>Kodierregel:</u> Schulmedizin, Alternativmedizin, Medizinische Forschung, gesundheitliche Einrichtungen, Pharmaindustrie, Ärzte werden erwähnt.                                                                                                                                                                                                                                                                                                                                                                                                 |
| Überprüfung Konzept<br>NLQ\ Aspekte\ Bildung/Wisse-<br>n\ Bildungs- und Schulsystem                                                                    | Bildungs- und<br>Schulsystem            | <u>Kodierregel:</u> Es geht um die Art und Weise wie unterrichtet wird, um das gesamte System in der Schule und anderen Bildungsinstitutionen                                                                                                                                                                                                                                                                                                                                                                                                      |
| Überprüfung Konzept NLQ\<br>Fördernisse und<br>Hindernisse\ Vorhandene<br>Hindernisse für<br>(N)LQ\ Leistungs- und<br>Erwartungsdruck (LQ)             | Leistungs- und<br>Erwartungsdruck       | <u>Kodierregel:</u> Es geht um Erwartungen anderer bez. Leistung in verschiedenen Bereichen, bei der Arbeit, in der Schule oder an anderen Stellen. Es kann auch um das Gefühl gehen, Erwartungen und Levels gerecht werden zu müssen.                                                                                                                                                                                                                                                                                                             |
| Überprüfung Konzept<br>NLQ\ Aspekte\ Freizeit/Erhol-<br>ung\ Freizeit                                                                                  | Freizeit                                | <u>Kodierregel:</u> Freizeit, Verhältnis von Freizeit zu Arbeit                                                                                                                                                                                                                                                                                                                                                                                                                                                                                    |
| Einfluss auf NLQ<br>(Zusammenhänge)\<br>Massnahmen                                                                                                     | Massnahmen                              | Titel. Nicht codieren<br>Darunter stehen Subcodes, die besagen, was Massnahmen sind, um NLQ zu stärken<br>Codes sind als Verb benannt<br><br>Begründung: Um Frage zu beantworten was gemacht werden kann oder woran man dran ist um NLQ zu verbessern, fördern, stärken.                                                                                                                                                                                                                                                                           |
| Einfluss auf NLQ<br>(Zusammenhänge)\ Status                                                                                                            | Status                                  | Titel, nicht codieren!                                                                                                                                                                                                                                                                                                                                                                                                                                                                                                                             |
| Einfluss auf NLQ<br>(Zusammenhänge)\<br>Massnahmen\ Arbeit/Finanzie-<br>lles/Wirtschaft\ Einkommen<br>der Region\ Regionale<br>Produktion unterstützen | Regionale<br>Produktion<br>unterstützen | <u>Kodierregel:</u> Es wird seitens Produzenten oder Konsumenten gewünscht, dass die regionale Produktion und damit auch die regionale Versorgung durch Produkte abgedeckt oder zumindest erweitert werden kann sowie dass diese regionalen Produkte unterstützt werden                                                                                                                                                                                                                                                                            |

|                                                                                                                                                |                                                         |                                                                                                                                                                                                                                                                                                                                                                                                                                                                                                                                                                     |
|------------------------------------------------------------------------------------------------------------------------------------------------|---------------------------------------------------------|---------------------------------------------------------------------------------------------------------------------------------------------------------------------------------------------------------------------------------------------------------------------------------------------------------------------------------------------------------------------------------------------------------------------------------------------------------------------------------------------------------------------------------------------------------------------|
| Einfluss auf NLQ (Zusammenhänge) \ Massnahmen \ Konsum \ nachhaltige Ernährung/Lebensmittel \ Markt organisieren/ermöglichen                   | Ermöglichung/Organisation eines Marktes                 | <u>Kodierregel:</u> Es wird seitens Produzenten oder Konsumenten gewünscht, dass ein regelmässiger (Bauern)Markt zum Verkauf/Kauf von regionalen Produkten in der näheren Umgebung vorhanden wäre, damit regionale Produkte an einem Ort einkauft werden könne und nicht bei verschiedenen Höfen abgeholt werden müssen.                                                                                                                                                                                                                                            |
| Einfluss auf NLQ (Zusammenhänge) \ Massnahmen \ Mobilität \ ÖV \ ÖV die häufiger fährt, vernetzter ist                                         | ÖV, der häufiger fährt                                  | <u>Kodierregel:</u> Es wird der Wunsch geäussert, dass ÖV häufiger fährt, regelmässiger, ev. auch länger in den Abend hinein oder weiter ausgebaut sein sollte (bessere Vernetzung oder mehr Haltestellen)                                                                                                                                                                                                                                                                                                                                                          |
| Einfluss auf NLQ (Zusammenhänge) \ Massnahmen \ Freizeit/Erholung \ Breiteres/besseres Freizeitangebot \ Kulturangebot erweitern               | Mehr Kultur/Gastro-Angebote bieten                      | <u>Kodierregel:</u> Es wird ein Café, ein Restaurant oder ein anderes Kulturangebot gewünscht                                                                                                                                                                                                                                                                                                                                                                                                                                                                       |
| Einfluss auf NLQ (Zusammenhänge) \ Massnahmen \ Arbeit/Finanzlles/Wirtschaft \ Leistungsdruck verringern                                       | Leistungsdruck verringern                               | <u>Kodierregel:</u> Es geht darum, dass der Leistungsdruck am Arbeitsplatz, in der Schule oder in der Gesellschaft allgemein zu hoch ist.                                                                                                                                                                                                                                                                                                                                                                                                                           |
| Einfluss auf NLQ (Zusammenhänge) \ Massnahmen \ Verhalten/Bewusstsein/Wissen \ Beratungen erweitern, häufiger machen                           | Beratungen erweitern, häufiger machen                   | <u>Kodierregel:</u> Es wird gewünscht, dass Beratungen in bestimmten Arbeitsbereichen, etwa Landwirtschaft ausgebaut, erweitert werden                                                                                                                                                                                                                                                                                                                                                                                                                              |
| Einfluss auf NLQ (Zusammenhänge) \ Massnahmen \ Konsum \ nachhaltige Ernährung/Lebensmittel \ Wertschöpfung stärken                            | Wertschöpfung stärken                                   | <u>Kodierregel:</u> Es wird gewünscht, dass Produkte die produziert werden mehr geschätzt werden und ihrem Wert/Qualität gerecht bezahlt werden bzw. dass die Bereitschaft hierzu gefördert wird.                                                                                                                                                                                                                                                                                                                                                                   |
| Einfluss auf NLQ (Zusammenhänge) \ Massnahmen \ Arbeit/Finanzlles/Wirtschaft \ Einkommen der Region \ Tourismus fördern der Einkommen bringt   | Tourismus fördern der Einkommen bringt                  | <u>Kodierregel:</u> es wird als Hindernis bezeichnet, dass Touristen nur als Tagestouristen kommen oder als grosse Gruppen, die zu schnell weitergehen, ohne zum Einkommen der Region beizutragen (ohne zu konsumieren, übernachten etc.)                                                                                                                                                                                                                                                                                                                           |
| Einfluss auf NLQ (Zusammenhänge) \ Massnahmen \ Verhalten/Bewusstsein/Wissen \ Bildung \ Nachhaltigkeits- und Umweltbildung fördern, erweitern | Nachhaltigkeits- und Umweltbildung fördern, erweitern   | <u>Kodierregel:</u> Es wird gewünscht, dass das Wissen, Bewusstsein oder Verhalten zu Nachhaltigkeit, Natur oder Umwelt im Bildungssystem gestärkt wird.                                                                                                                                                                                                                                                                                                                                                                                                            |
| Einfluss auf NLQ (Zusammenhänge) \ Massnahmen \ Wohnen \ Zersiedlung und Versiegelung von Grünflächen verhindern                               | Zersiedlung und Versiegelung von Grünflächen verhindern | <u>Kodierregel:</u> Es wird gewünscht, dass eine Zersiedlung und das Verbauen von Landschaften verhindert wird<br><br><u>Ankerbeispiel:</u> "Aso för mich müessti klar, so wenn ebe hött neu Hüsere baut werded, müessted för mich eifach klar eso Uuflage do si, för Nachhaltigkeit im Sinn, dass ökologisch richtig baut werd. Dass das Land guet uusgnötzt werd, verdichtet baut werd, aso of die Art. Da dänk ich macht mer vell zwenig. Aso sösch passiert ebe die Zersiedelig, oder ergenden Buur hett halt weder Land, woner wott lizone ond dennig bruum! " |
| Einfluss auf NLQ (Zusammenhänge) \ Massnahmen \ Mittel zum Zweck \ Zusammenarbeit und Vernetzung fördern                                       | Zusammenarbeit und Vernetzung fördern                   | <u>Kodierregel:</u> Zusammenarbeit zwischen Institutionen, Firmen, Produzenten, Veranstalter etc. soll enger werden, mehr Kommunikation, mehr Austausch, mehr Zusammenarbeit, mehr Abgleichungen.<br><br><u>Ankerbeispiel:</u> "Mängisch wörd ich mer äü no wönsche, wenn do no meh wörd mit de/ mit Lüüt innerhalb vo de Dörfer oder Regione zäme wörd gschaffet wärde. "                                                                                                                                                                                          |

|                                                                                                                                                                                 |                                              |                                                                                                                                                                                                                                                                                                                                                                                                                                                                                                          |
|---------------------------------------------------------------------------------------------------------------------------------------------------------------------------------|----------------------------------------------|----------------------------------------------------------------------------------------------------------------------------------------------------------------------------------------------------------------------------------------------------------------------------------------------------------------------------------------------------------------------------------------------------------------------------------------------------------------------------------------------------------|
| Einfluss auf NLQ (Zusammenhänge) \ Massnahmen \ Mobilität \ ÖV \ Günstige Angebote für ÖV                                                                                       | Günstige Angebote für ÖV                     | <u>Kodierregel:</u> Der ÖV wird als zu teuer bezeichnet. Es werden mehr Angebote bzw. Möglichkeiten gewünscht, günstiger damit zu reisen                                                                                                                                                                                                                                                                                                                                                                 |
| Einfluss auf NLQ (Zusammenhänge) \ Massnahmen \ Verhalten/Bewusstsein/Wissen \ Bildung \ Bildungsinstitutionen vor Ort ermöglichen                                              | Bildungsinstitutionen vor Ort ermöglichen    | <u>Kodierregel:</u> Es werden Kantonsschulen, Berufsschulen, Matura oder andere Bildungsinstitutionen gewünscht, damit nicht mehr so weit gefahren werden muss<br><br><u>Ankerbeispiel:</u> "Es isch nüt do, oder, es isch eifach verflatteret alles so meh oder weniger, oder. Ich weiss scho, dass ned jedi Region dörf/cha ehri Kantonsschuel ha oder ehri Maturität, aber mängisch hani amigs sGfüehl, es isch e grossi Region, oder."                                                               |
| Einfluss auf NLQ (Zusammenhänge) \ Massnahmen \ Freizeit/Erholung \ Traditionen aufrechterhalten                                                                                | Traditionen aufrechterhalten                 | <u>Kodierregel:</u> Der Wunsch wird geäussert, dass alte Traditionen, Teil der Kultur (etwa auch Dialekt, Bräuche, Musik etc.) erhalten bleiben sollen<br><br><u>Ankerbeispiel:</u> "ich ha nüt gäge neu Zuezügler oder gäge neu Lüt oder weiss ich was, im Gegeteil mir bruched die aber mä soll au die alte Traditione chöne wiiter lebe und ned alles verbiete oder also. "                                                                                                                           |
| Einfluss auf NLQ (Zusammenhänge) \ Massnahmen \ Verhalten/Bewusstsein/Wissen \ Bildung \ Nachhaltigkeits- und Umweltbildung fördern, erweitern \ Sensibilisierung zu N. stärken | Bewusstsein zu N. stärken                    | <u>Kodierregel:</u> Es wird gewünscht, dass sich mehr Menschen bewusst sind über ihr Verhalten, dass Menschen mehr wissen über N. Egal über welches Mittel<br>Code unterscheidet sich von Code "Nachhaltigkeitsbildung stärken" in dem es nicht um Bildungssystem geht sondern um Gesellschaft (auch Menschen die nicht in Ausbildung oder Schulen sind)<br><br>Evtl. nicht nur Zu N sondern allgemein zu ihrem Verhalten?? (was ist z.B. mit Bildung zur Gleichstellung der Menschen? Wurde gewünscht.) |
| Einfluss auf NLQ (Zusammenhänge) \ Massnahmen \ Natur/Umwelt \ Intakte Natur erhalten                                                                                           | Intakte Natur erhalten                       | <u>Kodierregel:</u> Es wird gewünscht, dass man sich darum kümmert, die Natur/Umwelt zu erhalten                                                                                                                                                                                                                                                                                                                                                                                                         |
| Überprüfung Konzept NLQ \ Aspekte \ Wohnen \ WG                                                                                                                                 | WG                                           | <u>Kodierregel:</u> eine Wohngemeinschaft wird genannt                                                                                                                                                                                                                                                                                                                                                                                                                                                   |
| Überprüfung Konzept NLQ \ Aspekte \ Gesundheit und Sicherheit \ Sicherheit                                                                                                      | Sicherheit                                   | <u>Kodierregel:</u> Es geht um Sicherheit (positiv) bez. Kriminalität, Katastrophen, Terror, Unfälle usw.                                                                                                                                                                                                                                                                                                                                                                                                |
| Überprüfung Konzept NLQ \ Aspekte \ Neue Aspekte LQ \ Ziele haben                                                                                                               | Ziele haben                                  | <u>Kodierregel:</u> Ein Ziel im Ausblick zu haben, einen Sinn zu erfüllen, ein Projekt zu verfolgen<br><br><u>Ankerbeispiel:</u> "ja ond irgendwie äu sZiel im Läbe ha, so. Ergendwie es Projekt womer dra schaffet, oder ergendöppis womer well erreiche, womer chan drufhiirbeite."                                                                                                                                                                                                                    |
| Einfluss auf NLQ (Zusammenhänge) \ Massnahmen \ Arbeit/Finanzelles/Wirtschaft \ Verkaufsstellen und Dienstleistungen fördern                                                    | Verkaufsstellen und Dienstleistungen fördern | <u>Kodierregel:</u> Es wird als Hindernis bezeichnet, dass manche Läden, die Post, die Bank oder andere Dienstleistungen im Dorf fehlen und dass es wünschenswert wäre, wenn diese vorhanden wären                                                                                                                                                                                                                                                                                                       |
| Einfluss auf NLQ (Zusammenhänge) \ Massnahmen \ Energiemassnahmen \ Erneuerbarer Energien \ Wasserkraft nutzen                                                                  | Wasserkraft nutzen                           | <u>Kodierregel:</u> Es wird gewünscht, dass zur Energieerzeugung Wasserkraft genutzt wird                                                                                                                                                                                                                                                                                                                                                                                                                |
| Einfluss auf NLQ (Zusammenhänge) \ Massnahmen \ Konsum \ Recycling/Abfall \ Angebote die Verpackungen vermeiden                                                                 | Angebote die Verpackungen vermeiden          | <u>Kodierregel:</u> Sogenannte No-Waste-Läden werden genannt und gewünscht oder andere Möglichkeiten Plastik sowie Verpackungen zu verringern                                                                                                                                                                                                                                                                                                                                                            |

|                                                                                                                                                                           |                                          |                                                                                                                                                                                                                                                                                                                                                                                                                                                                                                                                                                                                                                                                                                                                                                                                                                                                                                                                                                    |
|---------------------------------------------------------------------------------------------------------------------------------------------------------------------------|------------------------------------------|--------------------------------------------------------------------------------------------------------------------------------------------------------------------------------------------------------------------------------------------------------------------------------------------------------------------------------------------------------------------------------------------------------------------------------------------------------------------------------------------------------------------------------------------------------------------------------------------------------------------------------------------------------------------------------------------------------------------------------------------------------------------------------------------------------------------------------------------------------------------------------------------------------------------------------------------------------------------|
| Überprüfung Konzept NLQ\Aspekte\Bildung/Wissen\Bildung                                                                                                                    | Bildung                                  | <u>Kodierregel:</u> Bildung an und für sich, egal ob durch eine Schule oder selbst. Im Gegensatz zum Code Bildungssystem ist hier das Verb gemeint, Bildung/bilden und nicht das System                                                                                                                                                                                                                                                                                                                                                                                                                                                                                                                                                                                                                                                                                                                                                                            |
| Überprüfung Konzept NLQ\Aspekte\Soziale Beziehungen\Freunde/Kollegen                                                                                                      | Freunde/Kollegen                         | <u>Kodierregel:</u> Alles was man Freundeskreis, Kollegen usw. zu tun hat.                                                                                                                                                                                                                                                                                                                                                                                                                                                                                                                                                                                                                                                                                                                                                                                                                                                                                         |
| Überprüfung Konzept NLQ\Aspekte\Arbeit/Finanzielles\Wirtschaft                                                                                                            | Wirtschaft                               | <u>Kodierregel:</u> Wirtschaft wird als Gesamtgefüge genannt                                                                                                                                                                                                                                                                                                                                                                                                                                                                                                                                                                                                                                                                                                                                                                                                                                                                                                       |
| Überprüfung Konzept NLQ\Fördernde und Hindernisse\Vorhandene Hindernisse für (N)LQ\Wirtschaft/Finanzielles                                                                | Wirtschaft/Finanzielles                  | <p><u>Kodierregel:</u> Wirtschaftliche Gründe, finanzielle Gründe, Wirtschaftswachstum, Konkurrenz, globaler Markt usw. werden in irgendeiner Form als Hindernis für NLQ genannt.</p> <p><u>Ankerbeispiele:</u> "Heisst das jetzt einfach, dass die Wirtschaft in den nächsten 50 Jahren um zwei Prozent wachsen? Oder heisst nachhaltiges Wirtschaftswachstum, dass sie nach den 50 Jahren immer noch wachsen, oder dass sie überhaupt noch vorhanden ist, böse geist, weil wenn denn nicht mehr, die Natur auch geschädigt ist, denn funktioniert auch die Wirtschaft nicht mehr"</p> <p>"Und das ist auch so, wir sind auch hier unter Druck von Österreich und von Deutschland. Mir verhaufens in Österreich der Rundholz, (unv.) denn wirds verarbeitet und kommt wieder da raus, die schönen aus Konkurrenzieren wie gewiss Subventionen bekommen. Ist einfach verrückt, nicht die Ordnung. Auch hier auf Kosten der Umwelt, die hin und her Garetleri."</p> |
| Überprüfung Konzept NLQ\Fördernde und Hindernisse\Vorhandene Hindernisse für (N)LQ\Nichtnachhaltige Verhaltensweisen\Gewohnheiten                                         | Verhalten der Menschen                   | <p><u>Kodierregel:</u> Das Verhalten oder/und die Gewohnheiten der Menschen oder von einem selbst werden als hinderlich oder gar als Problem für N oder LQ bezeichnet. Ev. wird auch angesprochen, dass es schwierig ist Verhaltensweisen zu verändern, dass sich andere Leute falsch verhalten, dass andere gleichgültig sind, sich zu wenig achten etc.</p> <p><u>Ankerbeispiel:</u> "der Mensch ist es Gewohnheitstier du machst es halt einfach so irgendwie und ja, wie wottsch das Verhalten ändern, dass es von sich aus kommt, "</p> <p>Sie sind einfach zöhl sich selber einschränken kann ich mangelhaftes Gefühl. Oder man braucht einfach wie abotet wird.</p>                                                                                                                                                                                                                                                                                         |
| Überprüfung Konzept NLQ\Fördernde und Hindernisse\Vorhandene Fördernde für (N)LQ\Home Office (N oder LQ)                                                                  | Home Office                              | <u>Kodierregel:</u> Es wird in irgend einer Weise angesprochen, dass Home Office nachhaltig ist bzw. NLQ fördert.                                                                                                                                                                                                                                                                                                                                                                                                                                                                                                                                                                                                                                                                                                                                                                                                                                                  |
| Einfluss auf NLQ (Zusammenhänge)\Massnahmen\Arbeit/Finanzelles/Wirtschaft\Einkommen der Region\Regionale Produktion unterstützen\Höhere Verzollung ausländischer Produkte | Höhere Verzollung ausländischer Produkte | <u>Kodierregel:</u> Aufgrund der Problematik von Einkaufstourismus und den günstigeren Produkten vom Ausland zudem Konkurrenz des globalen Marktes, wird eine höhere Verzollung der Produkte verlangt.                                                                                                                                                                                                                                                                                                                                                                                                                                                                                                                                                                                                                                                                                                                                                             |
| Überprüfung Konzept NLQ\Fördernde und Hindernisse\Vorhandene Fördernde für (N)LQ\Elektromobilität                                                                         | Elektromobilität                         | <u>Kodierregel:</u> Elektromobilität mit Elektroautos, Elektrovelo usw.                                                                                                                                                                                                                                                                                                                                                                                                                                                                                                                                                                                                                                                                                                                                                                                                                                                                                            |
| Überprüfung Konzept NLQ\Aspekte\Freizeit/Erholung\Kulturangebot\Gastronomie/Hotellerie                                                                                    | Gastronomie                              | <u>Kodierregel:</u> Alle Themen, die mit Restaurants, Hotels, Bars, Cafés zu tun haben                                                                                                                                                                                                                                                                                                                                                                                                                                                                                                                                                                                                                                                                                                                                                                                                                                                                             |
| Einfluss auf NLQ (Zusammenhänge)\Massnahmen\Mobilität\Auto                                                                                                                | Verschmutzende Autos aus Verkehr         | <u>Kodierregel:</u> Es wird gewünscht, dass Dieselfahrzeuge und andere stark verschmutzende Autos aus dem Verkehr genommen werden.                                                                                                                                                                                                                                                                                                                                                                                                                                                                                                                                                                                                                                                                                                                                                                                                                                 |

|                                                                                                                                                                         |                                              |                                                                                                                                                                                                                                                                                                                                                                                  |
|-------------------------------------------------------------------------------------------------------------------------------------------------------------------------|----------------------------------------------|----------------------------------------------------------------------------------------------------------------------------------------------------------------------------------------------------------------------------------------------------------------------------------------------------------------------------------------------------------------------------------|
| verkehr<br>verringern \ Verschmutzende<br>Autos aus verkehr                                                                                                             |                                              |                                                                                                                                                                                                                                                                                                                                                                                  |
| Überprüfung Konzept<br>NLQ \ Aspekte \ Neue Aspekte<br>LQ \ Mentalität \ Einstellung \ Po<br>litische Einstellung                                                       | Politische<br>Einstellung der<br>Bevölkerung | <u>Kodierregel:</u> Die politische Gesinnung der Umgebung, des Dorfes, der Politik etc. wird als einen Aspekt für Wohlbefinden oder Unwohlsein genannt oder als einen Aspekt von LQ, als Grund umzuziehen/herzuziehen, als Fördernis, Hindernis für N, für LQ usw.                                                                                                               |
| Überprüfung Konzept<br>NLQ \ Aspekte \ Soziale<br>Beziehungen \ Gerechtigkeit / U<br>ngerechtigkeit \ soziale<br>Ungleichheit                                           | Soziale Ungleichheit                         | <u>Kodierregel:</u> Es wird thematisiert, dass manche Menschen mit bedeutend weniger Geld auskommen müssen als andere, dass Ungleichheiten zwischen Armut und Reichtum vorhanden ist, dass manche Personen auf Sozialhilfe oder andere finanzielle Unterstützung angewiesen sind. Kann auch die Thematisierung verschiedener Schichten sein, die mit Finanziellem zusammenhängt. |
| Überprüfung Konzept<br>NLQ \ Aspekte \ Soziale<br>Beziehungen \ Gerechtigkeit / U<br>ngerechtigkeit                                                                     | Ungerechtigkeit                              | <u>Kodierregel:</u> In einem politischen, sozialen, zwischenmenschlichen Sinne wird irgendeiner Form von Ungerechtigkeit wahrgenommen, für sich selbst oder andere.                                                                                                                                                                                                              |
| Überprüfung Konzept NLQ \<br>Fördernisse und<br>Hindernisse \ Vorhandene<br>Fördernisse für<br>(N) LQ \ Elektromobilität \ Elekt<br>rofahrzeuge                         | Elektrofahrzeuge                             | <u>Kodierregel:</u> Alle Arten von Elektrofahrzeuge, Auto, Fahrrad, Mofa                                                                                                                                                                                                                                                                                                         |
| Überprüfung Konzept<br>NLQ \ Fördernisse und<br>Hindernisse \ Vorhandene<br>Hindernisse für<br>(N) LQ \ Negativ für<br>LQ \ Konkurs / Verschwinden<br>von Läden etc.    | Konkurs / Verschwin<br>den von Läden etc.    | <u>Kodierregel:</u> Alle Arten von Eingehen, Schliessung aus finanziellen Gründen von Bauernhöfen, Läden, Restaurants etc.                                                                                                                                                                                                                                                       |
| Überprüfung Konzept<br>NLQ \ Aspekte \ Wohnen \ Einf<br>amilienhaus                                                                                                     | Einfamilienhaus                              | <u>Kodierregel:</u> Im Gegensatz zum Mehrfamilienhaus oder einer Wohnung                                                                                                                                                                                                                                                                                                         |
| Überprüfung Konzept<br>NLQ \ Fördernisse und<br>Hindernisse \ Vorhandene<br>Fördernisse für<br>(N) LQ \ Carsharing                                                      | Carsharing                                   | <u>Kodierregel:</u> Es wird erwähnt, dass ein Auto möglichst geteilt wird                                                                                                                                                                                                                                                                                                        |
| Überprüfung Konzept<br>NLQ \ Aspekte \ Soziale<br>Beziehungen \ Soziale<br>Durchmischung                                                                                | Soziale<br>Durchmischung                     | <u>Kodierregel:</u> Multikulturelle Aspekte, verschiedene Altersgruppen, Bildungsgruppen etc. werden erwähnt.<br><br><u>Ankerbeispiel:</u> "Dormischig vode Altersgruppe isch äü do. Ja es hett do Zwillige, die send jetzt öppe halbjährig, das hani natürlisch äü gärn, ja. Ned nome so e Senioresiedlig"                                                                      |
| Überprüfung Konzept NLQ \<br>Fördernisse und<br>Hindernisse \ Vorhandene<br>Fördernisse für<br>(N) LQ \ Genügsamkeit (N oder<br>LQ) \ Kaufverhalten<br>einschränken (N) | Kaufverhalten<br>einschränken                | <u>Kodierregel:</u> Alles was weniger kaufen, weniger konsumieren betrifft, weniger neue Dinge                                                                                                                                                                                                                                                                                   |
| Einfluss auf NLQ<br>(Zusammenhänge) \ Massnah<br>men \ Mobilität \ Autoverkehr<br>verringern \ Verkehr<br>eindämmen / verlangsamten                                     | Verkehr<br>eindämmen / verlangsa<br>men      | <u>Kodierregel:</u> Es wird weniger Autoverkehr gewünscht, Umleitungen von Strassen oder Geschwindigkeitseinschränkungen                                                                                                                                                                                                                                                         |
| Einfluss auf NLQ<br>(Zusammenhänge) \<br>Massnahmen \ Politische<br>Massnahmen \ Professionalität<br>in politischen Gefügen                                             | Professionalität in<br>politischen Gefügen   | <u>Kodierregel:</u> Es wird angesprochen, dass in einer politischen Partei, ein/e PolitikerIn, im Gemeinderat oder einer anderen Stelle professionelles Arbeiten, genügend Kenntnisse, Wahrhaftigkeit (keine Kleinkorruption) vorhanden sein soll.                                                                                                                               |
| Überprüfung Konzept<br>NLQ \ Aspekte \ Wohnen \ Gen<br>ossenschaft                                                                                                      | Genossenschaft                               | <u>Kodierregel:</u> Genossenschaft zum Wohnen wird erwähnt                                                                                                                                                                                                                                                                                                                       |

|                                                                                                                                                                               |                                             |                                                                                                                                                                                                                                                                                                                                                                                                                                                                                                                                               |
|-------------------------------------------------------------------------------------------------------------------------------------------------------------------------------|---------------------------------------------|-----------------------------------------------------------------------------------------------------------------------------------------------------------------------------------------------------------------------------------------------------------------------------------------------------------------------------------------------------------------------------------------------------------------------------------------------------------------------------------------------------------------------------------------------|
| Überprüfung Konzept NLQ\<br>Fördernisse und<br>Hindernisse\ Vorhandene<br>Fördernisse für<br>(N)LQ\ Bauweisen\ Nachhalti<br>ges<br>Baumaterial/Bauweise/Energie<br>versorgung | Nachhaltiges<br>Baumaterial                 | <u>Kodierregel:</u> Es wird erklärt, dass das Material für den Bau des<br>Hauses in irgendwelcher Art und Weise nachhaltig ist.                                                                                                                                                                                                                                                                                                                                                                                                               |
| Einfluss auf NLQ<br>(Zusammenhänge)\<br>Massnahmen\ Natur/Umwelt\<br>Intakte Natur erhalten\ Mehr<br>Gebiete streng schützen                                                  | Mehr Gebiete streng<br>schützen             | <u>Kodierregel:</u> Es wird ausgesagt, dass mehr Naturschutz<br>vorhanden sein sollte, das mehr Gebiete strenger geschützt<br>werden sollen<br><br><u>Ankerbeispiel:</u> "Für mich söts meh Naturschutzgebiet geh, mehr<br>Gebiet wo mä laht lah sie, ned wo mä eifach mit dä Mountainbikes<br>dure/ oder bidä Wildtier, dass mä eifach strenger wär"                                                                                                                                                                                         |
| Überprüfung Konzept<br>NLQ\ Aspekte\ Soziale<br>Beziehungen\ Alter                                                                                                            | Alter                                       | <u>Kodierregel:</u> Alles was das Alter oder Menschen im höheren Alter<br>betrifft                                                                                                                                                                                                                                                                                                                                                                                                                                                            |
| Überprüfung Konzept<br>NLQ\ Aspekte\ Soziale<br>Beziehungen\ Junge                                                                                                            | Junge                                       | <u>Kodierregel:</u> Es wird über junge Menschen gesprochen, was sie<br>tun und was sie nicht tun, was sie sollten etc.                                                                                                                                                                                                                                                                                                                                                                                                                        |
| Überprüfung Konzept NLQ\<br>Fördernisse und<br>Hindernisse\ Vorhandene<br>Fördernisse für<br>(N)LQ\ Mietpreise/Kaufpreise<br>günstig (LQ)                                     | Mietpreise/Kaufpreis<br>e Wohnung           | <u>Kodierregel:</u> Es wird der Preis zum Wohnung bez. Häuser,<br>Wohnungen mieten oder kaufen erwähnt                                                                                                                                                                                                                                                                                                                                                                                                                                        |
| Einfluss auf NLQ<br>(Zusammenhänge)\<br>Massnahmen\ Konsum\ nachh<br>altige<br>Ernährung/Lebensmittel\ kein<br>en Verkauf von<br>Nichtnachhaltigem<br>Lebensmitteln           | Verkauf von<br>Nichtnachhaltigem<br>stoppen | <u>Kodierregel:</u> Es wird gewünscht, dass nichtsaisonale,<br>eingeflogene, unfair hergestellte, mit starker<br>Pestizidbehandlungen oder anderen nichtnachhaltigen<br>Bedingungen hergestellte Produkte nicht angeboten werden oder<br>eingeschränkt werden                                                                                                                                                                                                                                                                                 |
| Überprüfung Konzept NLQ\<br>Fördernisse und<br>Hindernisse\ Vorhandene<br>Hindernisse für<br>(N)LQ\ Nichtnachhaltige<br>Verhaltensweisen\ Übermüssi<br>ger Konsum\ Foodwaste  | Foodwaste                                   | <u>Kodierregel:</u> Das Verschenden von Lebensmitteln wird erwähnt                                                                                                                                                                                                                                                                                                                                                                                                                                                                            |
| Überprüfung Konzept<br>NLQ\ Aspekte\ Arbeit/Finanzi<br>elles\ Finanzielles<br>(wichtig)\ AHV/Pension                                                                          | AHV/Pension                                 | <u>Kodierregel:</u> AHV, Rente, Pension etc. werden in irgendeiner<br>Form erwähnt                                                                                                                                                                                                                                                                                                                                                                                                                                                            |
| Überprüfung Konzept<br>NLQ\ Aspekte\ Neue Aspekte<br>LQ\ Mentalität/Einstellung                                                                                               | Mentalität                                  | <u>Kodierregel:</u> Beschreibung der Art und Weise wie das soziale<br>Umfeld, im Dorf oder wo auch immer denkt, negativ oder positiv,<br>ob man gleich- oder anders gesinnt ist.<br><br>Unterscheidet sich von den Codes "Zusammenhalt" und<br>"Politische Einstellung der Bevölkerung" in dem es nicht<br>spezifisch um einen zwischenmenschlichen Zusammenhalt geht<br>oder die politische Neigung<br><br><u>Ankerbeispiel:</u> "wännd nid neu Idee aglost wärde, das isch nöd<br>interessant, das gfähred irgendwie das bestehende Gfüeg". |
| Einfluss auf NLQ<br>(Zusammenhänge)\<br>Massnahmen\ Soziale<br>Beziehungen/Soziales\ Gerech<br>te Verteilung von Reichtum                                                     | Gerechte Verteilung<br>von Reichtum         | <u>Kodierregel:</u> Es wird gewünscht, dass Reichtum und Armut nicht<br>mehr so weit auseinander klaffen, dass Geld fairer verteilt ist (auf<br>welche Art auch immer), ev. auch dass bez. Geld zwischen dem<br>globale Norden dem globalen Süden fairer verteilt wäre.                                                                                                                                                                                                                                                                       |
| Überprüfung Konzept NLQ\<br>Fördernisse und<br>Hindernisse\ Vorhandene<br>Fördernisse für                                                                                     | Fleischkonsum<br>einschränken               | <u>Kodierregel:</u> Die Verminderung von Fleischkonsum oder der<br>Verzicht auf Fleisch wird als Fördernis für N(LQ) genannt                                                                                                                                                                                                                                                                                                                                                                                                                  |



|                                                                                                                                                               |                                                    |                                                                                                                                                                                            |
|---------------------------------------------------------------------------------------------------------------------------------------------------------------|----------------------------------------------------|--------------------------------------------------------------------------------------------------------------------------------------------------------------------------------------------|
| (N)LQ\Genügsamkeit(N oder LQ)\Fleischkonsum einschränken (N)                                                                                                  |                                                    |                                                                                                                                                                                            |
| Überprüfung Konzept NLQ\<br>Fördernisse und<br>Hindernisse\ Vorhandene<br>Hindernisse für<br>(N)LQ\ Konsum wirkt negativ<br>auf ein anderes Land              | Effekt<br>Produktekonsum auf<br>ein Land (negativ) | <u>Kodierregel:</u> Produkte die aus dem Ausland hier gekauft werden haben einen negativen Effekt auf die Menschen oder die Natur in einem Land, auf die Regenwälder, sind ausbeutend etc. |
| Überprüfung Konzept NLQ\<br>Fördernisse und<br>Hindernisse\ Vorhandene<br>Hindernisse für<br>(N)LQ\ Nichtnachhaltige<br>Verhaltensweisen\ Mangel an<br>Wissen | Mangel an Wissen                                   | <u>Kodierregel:</u> Es wird erwähnt, dass die Person selbst oder andere zu wenig Wissen darüber verfügen, was nicht nachhaltig ist oder was nachhaltig wäre                                |
| Einfluss auf NLQ<br>(Zusammenhänge)\<br>Akteur\ Kanton                                                                                                        | Kanton                                             | <u>Kodierregel:</u> Der Kanton ist für etwas verantwortlich                                                                                                                                |
| Einfluss auf NLQ<br>(Zusammenhänge)\<br>Massnahmen\ Mobilität                                                                                                 | ÖV                                                 | Nur als Titel!                                                                                                                                                                             |
| Einfluss auf NLQ<br>(Zusammenhänge)\<br>Massnahmen\ Wohnen                                                                                                    | Wohnen                                             | Nur als Titel! Nicht codieren                                                                                                                                                              |
| Einfluss auf NLQ<br>(Zusammenhänge)\<br>Massnahmen\ Freizeit/Erholung                                                                                         | Freizeit/Erholung                                  | Nur als Titel. Hier alles einordnen, das Kultur, Gastro, Freizeitaktivitäten etc. betrifft                                                                                                 |
| Einfluss auf NLQ<br>(Zusammenhänge)\<br>Massnahmen\ Verhalten/Bewusstsein/Wissen                                                                              | Verhalten/Bewusstsein/Wissen                       | Nur als Titel! Nicht codieren! Hier alle Codes unterordnen, die Verhaltensveränderungen, Aufklärung, Bildung, Wissen betreffen                                                             |
| Einfluss auf NLQ<br>(Zusammenhänge)\<br>Massnahmen\ Konsum                                                                                                    | Verkauf/Konsum/Dienstleistungen                    | Nur als Titel, nicht codieren. Hier alles unterordnen, was Konsum, Einkaufen, Verkaufsstellen betrifft                                                                                     |
| Einfluss auf NLQ<br>(Zusammenhänge)\<br>Massnahmen\ Natur/Umwelt                                                                                              | Natur/Umwelt                                       | Nur Titel, nicht codieren. Hier alles unterordnen, das die Natur, Tiere oder die Umwelt betrifft                                                                                           |
| Einfluss auf NLQ<br>(Zusammenhänge)\<br>Massnahmen\ Soziale<br>Beziehungen/Soziales                                                                           | Soziale Beziehungen                                | Nur als Titel, nicht codieren. Alles unterordnen, was Beziehungen, Zwischenmenschliches betrifft                                                                                           |
| Einfluss auf NLQ<br>(Zusammenhänge)\<br>Massnahmen\ Arbeit/Finanzielles/Wirtschaft                                                                            | Arbeit/Finanzielles/Wirtschaft                     | Nur als Titel, nicht codieren. Alles unterordnen, das Wirtschaft, Finanzielles oder die Arbeitswelt betrifft.                                                                              |
| Einfluss auf NLQ<br>(Zusammenhänge)\<br>Massnahmen\ Politische<br>Massnahmen                                                                                  | Politisches Gefilde                                | Nur Titel, nicht codieren! Alle Codes unterordnen, die politische Entscheidungen, Verhalten, Beschlüsse, Regelungen betreffen. Auch politische Personen und deren Verhalten.               |
| Einfluss auf NLQ<br>(Zusammenhänge)\<br>Massnahmen\ Energiemassnahmen                                                                                         | Energiemassnahmen                                  | Nur Titel, nicht als Code verwenden. Alles Codes unterordnen, die Energie betreffen                                                                                                        |
| Einfluss auf NLQ<br>(Zusammenhänge)\<br>Massnahmen\ Mittel zum<br>Zweck                                                                                       | Mittel/Werkzeuge/Organisation für<br>Massnahmen    | Nur Titel, nicht als Code. Alle Codes unterordnen, die sich auf etwas beziehen MIT DEM etwas verändert werden kann, Mittel, Werkzeuge, Organisationsweisen                                 |
| Einfluss auf NLQ<br>(Zusammenhänge)\<br>Massnahmen\ Arbeit/Finanzielles/Wirtschaft\ Dorfentwicklung fördern\ Fluktuation<br>verhindern                        | Fluktuation<br>verhindern                          | <u>Kodierregel:</u> Es soll verhindert werden, dass zu viele Leute abwandern                                                                                                               |

|                                                                                                                                                                                  |                                       |                                                                                                                                                                                                                      |
|----------------------------------------------------------------------------------------------------------------------------------------------------------------------------------|---------------------------------------|----------------------------------------------------------------------------------------------------------------------------------------------------------------------------------------------------------------------|
| Einfluss auf NLQ<br>(Zusammenhänge)\<br>Massnahmen\Arbeit/Finanzie<br>lles/Wirtschaft\Einkommen<br>der Region\Regionale<br>Produktion<br>unterstützen\Mehr regionale<br>Produkte | Mehr regionale<br>Produkte            | <u>Kodierregel:</u> Es wird gewünscht, dass mehr in der Region<br>produziert wird, dass zusätzliche Produkte in der Region<br>produziert werden, die es bislang noch zu wenig noch gar nicht<br>gibt                 |
| Einfluss auf NLQ<br>(Zusammenhänge)\<br>Massnahmen\Soziale<br>Beziehungen/Soziales\Mehr<br>Offenheit ggü. "Fremden"                                                              | Mehr Offenheit ggü.<br>"Fremden"      | <u>Kodierregel:</u> Es wird gewünscht, dass ggü. TouristInnen,<br>ZugügerInnen, ggü. anderen Kulturen etc. mehr Offenheit,<br>weniger Vorbehalte gezeigt wird.                                                       |
| Einfluss auf NLQ<br>(Zusammenhänge)\<br>Massnahmen\Energiemassna<br>hmen\Förderung<br>erneuerbarer Energien\Mehr<br>Solarenergie                                                 | Mehr Solarenergie                     | <u>Kodierregel:</u> Es wird gewünscht, dass Solarenergie mehr genutzt<br>wird                                                                                                                                        |
| Einfluss auf NLQ<br>(Zusammenhänge)\<br>Massnahmen\Energiemassna<br>hmen\Förderung<br>erneuerbarer<br>Energien\Nutzung von Biogas                                                | Nutzung von Biogas                    | <u>Kodierregel:</u> Es wird gewünscht, dass Biogas entwickelt und<br>genutzt werden könnte                                                                                                                           |
| Einfluss auf NLQ<br>(Zusammenhänge)\<br>Massnahmen\Konsum\Recyc<br>ling/Abfall\Mehr Recycling-<br>Entsorgungsstellen                                                             | Mehr Recycling-<br>Entsorgungsstellen | <u>Kodierregel:</u> Es werden mehr Stellen, Möglichkeiten zur Nutzung<br>von Recycling gewünscht                                                                                                                     |
| Überprüfung Konzept NLQ\<br>Fördernde und<br>Hindernisse\Vorhandene<br>Hindernisse für<br>(N)LQ\Nichtnachhaltige<br>Verhaltensweisen\Übermäss<br>iger Konsum                     | Übermässiger<br>Konsum                | <u>Kodierregel:</u> Es wird angesprochen, dass zu viel gekauft bzw.<br>konsumiert wird                                                                                                                               |
| Überprüfung Konzept NLQ\<br>Fördernde und<br>Hindernisse\Vorhandene<br>Hindernisse für<br>(N)LQ\Dauer\Zeitmangel                                                                 | Zeitmangel                            | <u>Kodierregel:</u> Zeitmangel stellt ein Hindernis für LQ oder für<br>nachhaltiges Verhalten dar oder beides                                                                                                        |
| Überprüfung Konzept NLQ\<br>Fördernde und<br>Hindernisse\Vorhandene<br>Fördernde für<br>(N)LQ\Genügsamkeit(N oder<br>LQ)                                                         | Weniger ist mehr                      | <u>Kodierregel:</u> Alles was innerhalb eines Themas ist, bei dem<br>Suffizienz eingesetzt wird oder werden soll, bei dem weniger<br>konsumiert werden soll, bei dem man sich mit weniger zufrieden<br>stellen soll. |
| Überprüfung Konzept NLQ\<br>Fördernde und<br>Hindernisse\Vorhandene<br>Hindernisse für<br>(N)LQ\Abwanderung                                                                      | Abwanderung                           | <u>Kodierregel:</u> Es wird als problematisch gesehen, dass viele<br>DorfbewohnerInnen wegziehen.                                                                                                                    |
| Überprüfung Konzept<br>NLQ\Fördernde und<br>Hindernisse\Vorhandene<br>Fördernde für (N)LQ\Nähe<br>zu grösseren Zentren (N oder<br>LQ)                                            | Nähe zu grösseren<br>Zentren          | <u>Kodierregel:</u> Es wird beschrieben, dass der Standort gut ist, weil<br>man schnell in einer Stadt ist                                                                                                           |
| Einfluss auf NLQ<br>(Zusammenhänge)\<br>Massnahmen\Arbeit/Finanzie<br>lles/Wirtschaft\Einkommen<br>der Region\Tourismus<br>fördern der Einkommen                                 | Nachhaltiger<br>Tourismus fördern     | <u>Kodierregel:</u> Es wird erwähnt, dass ein Tourismus aufrecht<br>erhalten werden soll oder der Tourismus nachhaltig sein soll                                                                                     |

|                                                                                                                                                                                                                           |                                                   |                                                                                                                                                                                                                                                                                                            |
|---------------------------------------------------------------------------------------------------------------------------------------------------------------------------------------------------------------------------|---------------------------------------------------|------------------------------------------------------------------------------------------------------------------------------------------------------------------------------------------------------------------------------------------------------------------------------------------------------------|
| bringt \ Nachhaltiger<br>Toursimus fördern                                                                                                                                                                                |                                                   |                                                                                                                                                                                                                                                                                                            |
| Überprüfung Konzept NLQ \<br>Fördernisse und<br>Hindernisse \ Vorhandene<br>Hindernisse für<br>(N)LQ \ Nichtnachhaltige<br>Verhaltensweisen \ Mangel an<br>Interesse/mangelnde<br>Verantwortung/Egoismus \ La<br>ngeweile | Langeweile                                        | <u>Kodierregel:</u> Es kommt zum Ausdruck, dass etwas langweilig ist,<br>dass man sich langweilt etc.                                                                                                                                                                                                      |
| Überprüfung Konzept<br>NLQ \ LQ \ Subjektiv/individue<br>ll                                                                                                                                                               | Subjektiv/individuell                             | <u>Kodierregel:</u> Es wird beschrieben, dass LQ etwas ist, das jeder<br>anders sieht, etwas persönliches, individuelles, subjektives.<br><br><u>Ankerbeispiel:</u> "Jede suecht sich selber us."                                                                                                          |
| Überprüfung Konzept NLQ \<br>Fördernisse und<br>Hindernisse \ Vorhandene<br>Hindernisse für<br>(N)LQ \ Nichtnachhaltige<br>Verhaltensweisen \ Mangel an<br>Interesse/mangelnde<br>Verantwortung/Egoismus                  | Mangel an Interesse                               | <u>Kodierregel:</u> Es wird beschrieben, dass N oder LQ oder NLQ oder<br>ein Aspekt davon nicht möglich ist, weil sich bestimmte Personen<br>oder die Menschheit nicht interessiert oder sie keine<br>Verantwortung tragen, aus verschiedenen Gründen;<br>Gleichgültigkeit, Egoismus, Machtinteressen usw. |
| Einfluss auf NLQ<br>(Zusammenhänge) \ Massnah<br>men \ Wohnen \ Traditionelle<br>Bauweisen der Region<br>erhalten                                                                                                         | Traditionelle<br>Bauweisen der<br>Region erhalten | <u>Kodierregel:</u> Es wird gewünscht, dass auf die Architektur, ev.<br>auch auf Denkmalschutz geachtet wird und die typische Bauweise<br>der Region erhalten bleibt.                                                                                                                                      |
| Einfluss auf NLQ<br>(Zusammenhänge) \<br>Massnahmen \ Arbeit/Finanzie<br>lles/Wirtschaft \ AHV erhöhen                                                                                                                    | AHV erhöhen                                       | <u>Kodierregel:</u> Der Wunsch bezieht sich auf eine höhere AHV                                                                                                                                                                                                                                            |
| Einfluss auf NLQ<br>(Zusammenhänge) \<br>Massnahmen \ Natur/Umwelt \<br>Intakte Natur<br>erhalten \ Biodiversität/Artenvi<br>elfalt erhalten                                                                              | Artenvielfalt<br>erhalten                         | <u>Kodierregel:</u> In irgendeiner Weise kommt zum Ausdruck, dass<br>man Tiere, Insekten, Pflanzen etc. schützen müsse                                                                                                                                                                                     |
| Überprüfung Konzept<br>NLQ \ Aspekte \ Freizeit/Erhol<br>ung \ Genuss/Genussmittel                                                                                                                                        | Genuss/Genussmitte<br>l                           | <u>Kodierregel:</u> Im Zusammenhang von Geniessen wird ein Produkt<br>wie etwa Wein erwähnt oder etwas anderes, etwa ein besonderes<br>Restaurant etc. wird erwähnt                                                                                                                                        |
| Einfluss auf NLQ<br>(Zusammenhänge) \<br>Massnahmen \ Freizeit/Erholu<br>ng \ Breiteres/besseres<br>Freizeitangebot \ Kulturangebo<br>t erweitern \ Teilnahme der<br>Bevölkerung an Angeboten                             | Teilnahme der<br>Bevölkerung an<br>Angeboten      | <u>Kodierregel:</u> Es wird gewünscht, dass mehr EinwohnerInnen das<br>bestehende Freizeit- und Kulturangebot nutzen, um den sozialen<br>Austausche und Zusammenhalt zu fördern                                                                                                                            |
| Einfluss auf NLQ<br>(Zusammenhänge) \<br>Massnahmen \ Wohnen \ Subve<br>ntionen für Energieumstellung                                                                                                                     | Subventionen für<br>Energieumstellung             | <u>Kodierregel:</u> Die Idee, dass für die Umstellung auf erneuerbare<br>Energie Subventionen verteilt werden.                                                                                                                                                                                             |
| Überprüfung Konzept NLQ \<br>Fördernisse und<br>Hindernisse \ Vorhandene<br>Hindernisse für<br>(N)LQ \ Wirtschaft/Finanzielles<br>\ Lebensdauer der Produkte                                                              | Lebensdauer der<br>Produkte                       | <u>Kodierregel:</u> Produkte werden weniger nachhaltig hergestellt, d.h.<br>sie gehen schneller kaputt und neue Geräte usw. müssen gekauft<br>werden. Sie werden günstiger und damit auch niedrigerer<br>Qualität hergestellt.                                                                             |
| Einfluss auf NLQ<br>(Zusammenhänge) \<br>Massnahmen \ Politische<br>Massnahmen \ Libertärer<br>Paternalismus \ Kontrolle von<br>Gesetzen                                                                                  | Kontrolle von<br>Gesetzen                         | <u>Kodierregel:</u> Die Gesetze sind vorhanden, aber es wird<br>gewünscht, dass sie ausreichend geprüft und kontrolliert werden                                                                                                                                                                            |

|                                                                                                                                                        |                                                |                                                                                                                                                                                             |
|--------------------------------------------------------------------------------------------------------------------------------------------------------|------------------------------------------------|---------------------------------------------------------------------------------------------------------------------------------------------------------------------------------------------|
| Einfluss auf NLQ<br>(Zusammenhänge) \<br>Massnahmen \ Verhalten/Bewusstsein/Wissen \ Verantwortungsvolles Verhalten aus Überzeugung                    | Verantwortungsvolles Verhalten aus Überzeugung | <u>Kodierregel:</u> Es wird gewünscht, dass die Bevölkerung von sich aus mehr Verantwortung für ihr Verhalten übernimmt                                                                     |
| Einfluss auf NLQ<br>(Zusammenhänge) \<br>Massnahmen \ Soziale Beziehungen/Soziales \ Kinderbetreuung gemeinsam ermöglichen                             | Kinderbetreuung gemeinsam ermöglichen          | <u>Kodierregel:</u> Es wird gewünscht, dass es mehr Angebote für Kinderbetreuung im Dorf gibt oder dies als gemeinschaftliches Projekt ermöglicht wird                                      |
| Einfluss auf NLQ<br>(Zusammenhänge) \<br>Massnahmen \ Mobilität \ ÖV \ ÖV die häufiger fährt, vernetzter ist \ ÖV erhalten                             | ÖV erhalten                                    | <u>Kodierregel:</u> Es wird gewünscht, dass man den ÖV, den es bereits gibt erhält                                                                                                          |
| Einfluss auf NLQ<br>(Zusammenhänge) \<br>Massnahmen \ Konsum \ Im Mass konsumieren                                                                     | Im Mass konsumieren                            | <u>Kodierregel:</u> Die Bevölkerung soll weniger, im Mass oder verantwortungsvoll konsumieren und sich auch mit weniger zufrieden geben                                                     |
| Einfluss auf NLQ<br>(Zusammenhänge) \<br>Massnahmen \ Freizeit/Erholung \ breiteres/besseres Freizeitangebot \ Aktivitäten/Angebote für Junge          | Aktivitäten/Angebote für Junge                 | <u>Kodierregel:</u> Das Angebot für junge Leute könnte grösser oder breiter sein                                                                                                            |
| Einfluss auf NLQ<br>(Zusammenhänge) \<br>Massnahmen \ Wohnen \ Regenwasser für Abwasseranlagen                                                         | Regenwasser für Abwasseranlagen                | <u>Kodierregel:</u> Anstelle, davon dass Trinkwasser für WC und anderes verwendet wird, wird vorgeschlagen Regenwasser oder anderes zu verwenden, das weniger Aufwand und Energie benötigt. |
| Einfluss auf NLQ<br>(Zusammenhänge) \<br>Massnahmen \ Energiemassnahmen \ Förderung erneuerbarer Energien \ Kompletter Umstieg auf erneuerbare Energie | Kompletter Umstieg auf erneuerbare Energie     | <u>Kodierregel:</u> Fossile Energie soll gänzlich mit erneuerbarer Energie ersetzt werden                                                                                                   |
| Einfluss auf NLQ<br>(Zusammenhänge) \<br>Massnahmen \ Soziale Beziehungen/Soziales \ Frieden weltweit                                                  | Frieden weltweit                               | <u>Kodierregel:</u> Keine Kriege auf der gesamten Welt                                                                                                                                      |
| Einfluss auf NLQ<br>(Zusammenhänge) \<br>Massnahmen \ Soziale Beziehungen/Soziales \ Gleichstellung fördern \ Gleiche Chancen für alle                 | Gleiche Chancen für alle                       | <u>Kodierregel:</u> Kein Rassismus, keine Frauenfeindlichkeit oder andere Benachteiligung für bestimmte Gruppen sondern Gleichstellung für alle                                             |
| Überprüfung Konzept NLQ \ Aspekte \ Wohnen \ Versorgung Telefon/Internet                                                                               | Versorgung Telefon/Internet                    | <u>Kodierregel:</u> Sprecher erwähnt die Qualität des Empfangs von Telefon, Smartphone oder Internet                                                                                        |
| Einfluss auf NLQ<br>(Zusammenhänge) \<br>Massnahmen \ Arbeit/Finanzielles/Wirtschaft \ Einkommen der Region \ Regionale Arbeitsplätze erhalten         | Regionale Arbeitsplätze erhalten               | <u>Kodierregel:</u> Damit die Menschen in der Region bleiben können bzw. dort arbeiten sollen Arbeitsplätze erhalten bleiben                                                                |
| Überprüfung Konzept NLQ \<br>Fördernde und Hindernisse \ Vorhandene Fördernde für (N) \ Technik und Wissenschaft (N)                                   | Technik und Wissenschaft                       | <u>Kodierregel:</u> Technik und Wissenschaft kann bestimmte Probleme im Bereich N verhindern.                                                                                               |
| Überprüfung Konzept NLQ \<br>Fördernde und                                                                                                             | Korruption                                     | <u>Kodierregel:</u> Es wird in irgendeinem Zusammenhang erwähnt, dass Korruption ein Problem ist                                                                                            |

|                                                                                                                                                                                                                      |                                              |                                                                                                                                                                      |
|----------------------------------------------------------------------------------------------------------------------------------------------------------------------------------------------------------------------|----------------------------------------------|----------------------------------------------------------------------------------------------------------------------------------------------------------------------|
| Hindernisse \ Vorhandene Hindernisse für (N)LQ \ Korruption/Interessen                                                                                                                                               |                                              |                                                                                                                                                                      |
| Einfluss auf NLQ (Zusammenhänge) \ Massnahmen \ Energiemassnahmen \ Förderung erneuerbarer Energien \ Erforschung/Entwicklung erneuerbarer Energie                                                                   | Erforschung/Entwicklung erneuerbarer Energie | <u>Kodierregel:</u> Es wird gewünscht, dass Alternativen für Energien geschaffen werden und dass man an den Technologien arbeitet                                    |
| Einfluss auf NLQ (Zusammenhänge) \ Massnahmen \ Verhalten/Bewusstsein/Wissen \ Bildung \ Beratungen erweitern, häufiger machen \ Mehr Beratung Landwirtschaft                                                        | Mehr Beratung Landwirtschaft                 | <u>Kodierregel:</u> Es wird gewünscht, dass die Landwirtschaft bez. N. beraten, informiert wird                                                                      |
| Einfluss auf NLQ (Zusammenhänge) \ Massnahmen \ Wohnen \ Empfang Telekommunikation verbessern                                                                                                                        | Empfang Telekommunikation verbessern         | <u>Kodierregel:</u> Funklöcher oder Internetempfang soll verbessert werden                                                                                           |
| Einfluss auf NLQ (Zusammenhänge) \ Massnahmen \ Mittel zum Zweck \ Unterstützung vor Ort                                                                                                                             | Unterstützung vor Ort                        | <u>Kodierregel:</u> Es soll mehr Information und Unterstützung auf lokaler Ebene vorhanden sein, anstelle die Weiterleitung an grössere Ämter die u.a. kantonal sind |
| Einfluss auf NLQ (Zusammenhänge) \ Massnahmen \ Politische Massnahmen \ Lösungen umsetzen                                                                                                                            | Lösungen umsetzen                            | <u>Kodierregel:</u> Die Politik soll nicht nur reden sondern Lösungen umsetzen, sich nicht vor Verantwortung drücken                                                 |
| Einfluss auf NLQ (Zusammenhänge) \ Massnahmen \ Mobilität \ Autoverkehr verringern \ Autolobby weniger stark unterstützen                                                                                            | Autolobby weniger stark unterstützen         | <u>Kodierregel:</u> Das Autofahren wird durch Unterstützung von Lobbyismus gefördert. Autofahren ist daher zu günstig und bequem.                                    |
| Einfluss auf NLQ (Zusammenhänge) \ Massnahmen \ Verhalten/Bewusstsein/Wissen \ Bildung \ Nachhaltigkeits- und Umweltbildung fördern, erweitern \ Sensibilisierung zu N. stärken \ Mehr Informationen zu Lebensmittel | Mehr Informationen zu Lebensmittel           | <u>Kodierregel:</u> Zu CO2-Wert und Weiterem über Lebensmittel müssten mehr Informationen gegeben werden                                                             |
| Einfluss auf NLQ (Zusammenhänge) \ Massnahmen \ Wohnen \ Grösseres Angebot an Häuser zum kaufen                                                                                                                      | Grösseres Angebot an Häuser zum kaufen       | <u>Kodierregel:</u> Es wird gewünscht, dass man mehr Möglichkeiten hätte Eigentum zu kaufen                                                                          |
| Einfluss auf NLQ (Zusammenhänge) \ Massnahmen \ Arbeit/Finanzilles/Wirtschaft \ Einkommen der Region \ Tourismus fördern der Einkommen bringt \ Mehr Übernachtungsmöglichkeiten anbieten                             | Mehr Übernachtungsmöglichkeiten anbieten     | <u>Kodierregel:</u> In Bezug auf Tourismus                                                                                                                           |
| Überprüfung Konzept NLQ \ Fördernisse und Hindernisse \ Vorhandene Hindernisse für (N)LQ \ Andere Länder sind nicht nachhaltig                                                                                       | Andere Länder                                | <u>Kodierregel:</u> Andere Länder verhalten sich weniger nachhaltig. Die Schweiz hingegen wird eher als vorbildlich betrachtet.                                      |

|                                                                                                                                                                           |                                                     |                                                                                                                                                                                                            |
|---------------------------------------------------------------------------------------------------------------------------------------------------------------------------|-----------------------------------------------------|------------------------------------------------------------------------------------------------------------------------------------------------------------------------------------------------------------|
| Einfluss auf NLQ<br>(Zusammenhänge) \<br>Massnahmen \ Politische<br>Massnahmen \ Libertärer<br>Paternalismus \ Kosten für<br>Nichtnachhaltiges                            | Kosten für<br>Nichtnachhaltiges                     | <u>Kodierregel:</u> Eine Art liberaler Paternalismus wird verlangt, in<br>dem mit Steuern oder anders die Kosten für nichtnachhaltige<br>Produkte verlangt wird, für Benzin, Fliegen usw.                  |
| Einfluss auf NLQ<br>(Zusammenhänge) \<br>Massnahmen \ Konsum \ Recyc<br>ling/Abfall \ Angebote um<br>Plastik zu recyceln                                                  | Angebote um Plastik<br>zu recyceln                  | <u>Kodierregel:</u> Sammelsäcke für im Haushalt, für Plastik werden in<br>der Gemeinde vermisst                                                                                                            |
| Einfluss auf NLQ<br>(Zusammenhänge) \<br>Massnahmen \ Soziale<br>Beziehungen/Soziales \ Interne<br>t reduzieren                                                           | Internet reduzieren                                 | <u>Kodierregel:</u> Es wird gewünscht, dass Internet zur zu bestimmten<br>Zeiten vorhanden wäre, damit die Menschen mehr sozialen<br>Austausch haben, sich miteinander abgeben anstelle mit einem<br>Gerät |
| Überprüfung Konzept NLQ \<br>Fördernisse und<br>Hindernisse \ Vorhandene<br>Fördernisse für<br>(N)LQ \ Lebensmittel \ Regiona<br>le Lebensmittel/Herkunft<br>Lebensmittel | Regionale<br>Lebensmittel/Herku<br>nft Lebensmittel |                                                                                                                                                                                                            |
